# Supplementary material for: AdaLiftOver: high-resolution identification of orthologous regulatory elements with Adaptive liftOver
Source: PubMed Central journal article supplement (PMC10085516; doi:10.1093/bioinformatics/btad149), 2023-04-02
Supplement: btad149_supplementary_data.pdf [file btad149_supplementary_data.pdf]

# Supplementary Materials for “AdaLiftOver: High-resolution identification of orthologous regulatory elements with adaptive liftOver”

Chenyang Dong<sup>1,a</sup>, Siqi Shen<sup>2,a</sup>, and Sündüz Keleş<sup>1,2,\*</sup>

<sup>1</sup>Department of Statistics,

<sup>2</sup>Department of Biostatistics and Medical Informatics,

<sup>a</sup>These authors contributed equally,

Corresponding author: \*keles@stat.wisc.edu

## Contents

|          |                                                                                                                   |           |
|----------|-------------------------------------------------------------------------------------------------------------------|-----------|
| <b>1</b> | <b>Supplementary Notes</b>                                                                                        | <b>2</b>  |
| 1.1      | The orthologous gene promoters . . . . .                                                                          | 2         |
| 1.2      | The ENCODE datasets in the AdaLiftOver default repertoire for computing epigenomic feature similarities . . . . . | 2         |
| 1.3      | Evaluating similarity metrics with the ENCODE cCRE data . . . . .                                                 | 2         |
| 1.4      | Discussion on the choice of data formats and similarity metrics . . . . .                                         | 3         |
| 1.5      | Parameter tuning for AdaLiftOver . . . . .                                                                        | 4         |
| 1.6      | ENCODE and mouse ENCODE TF ChIP-seq datasets . . . . .                                                            | 4         |
| 1.7      | Benchmarking across multiple species with matched epigenome datasets . . . . .                                    | 5         |
| 1.8      | Schizophrenia GWAS SNPs . . . . .                                                                                 | 5         |
| 1.9      | Hematopoiesis GWAS SNPs . . . . .                                                                                 | 6         |
| 1.10     | Bone Mineral Density GWAS SNPs . . . . .                                                                          | 6         |
| <b>2</b> | <b>Supplementary Tables</b>                                                                                       | <b>7</b>  |
| <b>3</b> | <b>Supplementary Figures</b>                                                                                      | <b>37</b> |

# 1 Supplementary Notes

## 1.1 The orthologous gene promoters

We downloaded NCBI RefSeq gene annotation files from <https://hgdownload.soe.ucsc.edu/goldenPath/hg38/bigZips/genes/hg38.ncbiRefSeq.gtf.gz> and <https://hgdownload.soe.ucsc.edu/goldenPath/mm10/bigZips/genes/mm10.ncbiRefSeq.gtf.gz>. We utilized the human-mouse homology table from the Jackson Laboratory [http://www.informatics.jax.org/downloads/reports/HOM\\_MouseHumanSequence.rpt](http://www.informatics.jax.org/downloads/reports/HOM_MouseHumanSequence.rpt) and identified 16,374 orthologous genes in total. We defined the promoter region of a gene as 2 kb upstream and 200 bp downstream of the transcription start site (TSS). We explored two sets of chain files: the reciprocal chain files ("hg38.mm10.rbest.chain", "mm10.hg38.rbest.chain") and the UCSC liftOver tool default chain files ("hg38ToMm10.over.chain.gz", "mm10ToHg38.over.chain.gz") to determine the mappings between the orthologous promoters. We utilized both the UCSC liftOver command line tool by varying its various tuning parameters and its R implementation "rtracklayer::liftOver()" (a slim version without tuning parameters) to map all human/mouse promoters to the mouse/human genome and overlapped them with the corresponding counterparts. When a human/mouse promoter failed to map, we extended the promoters by 2 kb on both sides and remapped the extended region. In this context, we defined the positive and negative mappings as follows:

- True positive (TP): a promoter maps and overlaps with the correct counterpart.
- False positive (FP): a promoter maps but does not overlap with the correct counterpart.
- True negative (TN): a promoter fails to map or overlap with the correct counterpart after extending by 2 kb on both sides.
- False negative (FN): a promoter fails to map but it maps to the correct counterpart after extending by 2 kb on both sides.

The results are summarized in Supplementary Table 1.

## 1.2 The ENCODE datasets in the AdaLiftOver default repertoire for computing epigenomic feature similarities

The complete list of the datasets is provided in Supplementary Table 2.

## 1.3 Evaluating similarity metrics with the ENCODE cCRE data

The orthologous ENCODE cCRE data (v3) from both hg38 and mm10 were downloaded from <https://screen.encodeproject.org/>. We utilized the R function "rtracklayer::liftOver()" with the UCSC chain file "hg38.mm10.rbest.chain" to map human cCREs to mouse. The 103,529 orthologues were determined by requiring an overlap of at least 50% of the bases between the human cCRE orthologues and mouse cCREs. The human cCRE categories before and after mapping are summarized in Supplementary Figure 1.

With the 103,529 orthologous cCREs, we further evaluated the combinations of three different similarity metrics (Pearson correlation, cosine similarity, and soft cosine similarity<sup>1</sup>) and three different data formats summarizing the epigenomic signals in the form of peaks (BED format), fold change of normalized ChIP reads over control reads (Fold change BigWig), and

---

<sup>1</sup>soft\_cosine( $u, v$ ) =  $\frac{\sum_{i,j} s_{ij} u_i v_j}{\sqrt{\sum_{i,j} s_{ij} u_i u_j} \sqrt{\sum_{i,j} s_{ij} v_i v_j}}$ , where  $s_{ij}$  was estimated by the sample Pearson correlation between the  $i$ -th and  $j$ -th entries of epigenomic feature vectors for all human and mouse cCREs.

p-values comparing ChIP and control reads along the genome (P-value BigWig). We specifically considered:

- BED format: we overlapped each cCRE with the list of peaks and quantified the strength of the signal as the percentage overlap with the peaks (numerical value between 0 and 1).
- Fold change BigWig format: we computed the arithmetic average of BigWig signals for each cCRE.
- P-value BigWig format: we computed the geometric average of BigWig signals for each cCRE.

Supplementary Figure 2 illustrates that the soft cosine similarity underperforms compared to the other metrics, and the fold-change BigWig format is outperformed by the p-value BigWig format as benchmarked by the z-scores. We observe that the BED format and the p-value BigWig format yield the best performance when combined with the Pearson correlation and the cosine similarity, respectively. Although the p-value BigWig format (with the Pearson correlation metric) achieves higher average z-scores compared to the BED format (with the cosine similarity metric), it exhibits larger variability across all 6 cCRE categories (Supplementary Figure 2). Therefore, the numerical features derived from the BED format data are as robust and informative as the BigWig formatted data.

The binary features constructed by overlapping the cCREs with the peaks (BED format data) attain similar performance as the numerical features derived from the BED format data (with the cosine similarity metric) (Supplementary Figure 3). A comparison of Supplementary Figures 2 and 3 indicates that the cosine similarity, which shows less variability than the Jaccard similarity, is a better similarity metric for binary vectors. We also incorporated the Jaccard similarity option in AdaLiftOver.

#### 1.4 Discussion on the choice of data formats and similarity metrics

*Epigenomic feature similarity.* The 67 pairs of BigWig files from the ENCODE repertoire required  $\sim 10$  GB disk storage after being compressed from the  $\sim 150$  GB raw data to the Run-Length-Encoding structure separated by chromosomes. In contrast, only  $< 50$  MB space was required to store the binary signals of the BED files from the same ENCODE repertoire. Querying the BigWig format data, while it theoretically takes  $O(1)$  time complexity, was computational prohibitive for small servers and personal laptops. For a scientific computing server with Intel Xeon CPU E5-2680 v4 2.40GHz, it took  $\sim 20$  minutes to load the data in R and  $\sim 24$  hours to handle  $\sim 100,000$  orthologous genomic regions. However, querying the BED format data only took  $\sim 1$  minute for the same task. Further memory issues arose as the number of parallel jobs increase, rendering the overall approach using the BigWig numeric signals infeasible. On the contrary, the BED binary signals scaled well on a regular laptop. Therefore, AdaLiftOver leveraged binary features derived from the BED files with the cosine similarity metric for optimizing the disk storage, the computational speed, the scalability, and the performance robustness (Supplementary Figures 2 and 3).

*Sequence grammar feature similarity.* The pre-computed occurrence data for the 841 JASPAR motifs in the human and mouse genomes occupied  $\sim 200$  GB disk storage. Due to the high space requirement and to enable applicability to any model organism genome, we chose the motifmatchr R package, accelerated by C++ libraries, to perform on-demand motif scanning using PFM/PWMs. After quantifying motif occurrences, we used binary features and cosine similarity metric for the sequence grammar.

## 1.5 Parameter tuning for AdaLiftOver

*Leave-one-out cross validation (LOOCV) with the ENCODE datasets.* For each of the 67 ENCODE epigenome datasets in Supplementary Table 2, we utilized the remaining ENCODE datasets excluding those from the same tissue as the training data to compute epigenomic feature similarities. For a given set of human query regions (e.g., one of the human peak sets from Supplementary Table 2), we first identified candidate target regions in the mouse by lifting the query regions over to the mouse genome based on sequence conservation (R liftOver). Here, if a query region does not map, it gets extended on both sides and gets lifted over again. Then, these target regions in mouse are overlapped with the matched epigenomic data in the mouse and labeled as orthologous human-mouse pairs if they reside within a peak (Fig. 3c). This generates positive pairs: query region maps to mouse and the resulting target region overlaps with a peak in the matched peak set and negative pairs: query region maps to mouse but the resulting target region does not overlap with a peak in the matched peak set. These sets of positive and negative pairs are utilized for true/false positive calls. Supplementary Figure 4 illustrates that the optimal window size lies between 1 kb and 3 kb when evaluated across a grid of window sizes by considering the trade-off between AUPR and AUROC. In practice, we suggest using a window size within this 1 to 3 kb range.

At window size of 2 kb, we summarize below the estimated logistic regression coefficients (mean  $\pm$  s.e.;  $\hat{\beta}_0, \hat{\beta}_1, \hat{\beta}_2$  denote the estimated coefficients for the intercept, epigenomic feature similarity, and sequence grammar feature similarity, respectively):

- $\hat{\beta}_0 = -4.16 \pm 0.231$
- $\hat{\beta}_1 = 5.40 \pm 0.349$
- $\hat{\beta}_2 = 2.06 \pm 0.212$

We used this set of parameters as default for the rest of the manuscript for mapping between human and mouse. With the constraint of filtering at most 50% of candidate target regions, we identified logistic probability score thresholds  $0.376 \pm 0.0374$  that maximize the precision  $0.554 \pm 0.0371$  using the AdaLiftOver training module. We selected the score threshold = 0.4 for the case studies on ATAC-seq and ChIP-seq peaks. The effects of selecting a logistic probability score threshold can be visually investigated with ROC/PR curves. The users may increase/decrease the score threshold if more stringent/lenient results are needed. We also considered an interaction term between the epigenomic feature similarity and the sequence grammar feature similarity in the logistic regression. However, the area under the curves did not yield significant differences with or without an interaction term (Mann-Whitney test p-values: 0.9752 for AUROC, 0.9539 for AUPR). AdaLiftOver implementation allows the inclusion of such an interaction term which might impact the results in other datasets.

## 1.6 ENCODE and mouse ENCODE TF ChIP-seq datasets

We utilized 55 pairs of TF ChIP-seq datasets from Cheng *et al.*, 2014 (Supplementary Table 3). The methods were run under the following settings:

- AdaLiftOver: threshold = 0.4. The chain file is “mm10.hg38.rbest.chain”
- bnMapper: Default parameters. The chain file is “mm10.hg38.rbest.chain”
- UCSC liftOver: The R function “rtracklayer::liftOver()”. The chain file is “mm10ToHg38.over.chain”

- EpiAlignment: window = 2 kb. To tune EpiAlignment fairly, for MEL vs K562 samples, we used paired Erythroid cells H3K4me3 ChIP-seq data as the epigenome data input; For CH12 vs GM12878 samples, we used Lymphoblast cells H3K4me3 ChIP-seq data as the epigenome data input.

The results are summarized in in Supplementary Table 4.

We then downloaded the following ENCODE ATAC-seq/DNase-seq datasets to evaluate the performances of AdaLiftOver with matched tissues/cell types:

- mouse-CH12, DNase-seq, ENCFF855RCO.bed
- human-GM12878, ATAC-seq, ENCFF470YYO.bed
- mouse-MEL, DNase-seq, ENCFF726EZS.bed
- human-K562, ATAC-seq, ENCFF558BLC.bed

When combining the above epigenome profiles with the default ENCODE epigenome repertoire, we set the weights ( $w$ ) of the epigenomic features from the matched tissues by a factor of 10 more in the similarity calculations.

## 1.7 Benchmarking across multiple species with matched epigenome datasets

We included six additional species, namely chicken, cow (7 and 8 samples, respectively, from Kern *et al.*, 2021), horse (8 samples from Kingsley *et al.*, 2019), pig (15 samples from Zhao *et al.*, 2021), rat (3 samples from Rintisch *et al.*, 2014; Treviño *et al.*, 2020; Lien *et al.*, 2020) and zebrafish (30 samples from Yang *et al.*, 2020) to our comparisons. This brought the total number of species to 7.

We used the corresponding rbest chain files for each of these species. We used a leave-one-out cross-validation strategy similar to that of Subsection 1.6 for the human-mouse experiments of matched epigenomic datasets, with a probability score threshold of 0.4.

Furthermore, we also added new modules for the additional species to the AdaLiftOver R package vignette, where we similarly used averages of the logistic regression parameter estimates from folds of the cross-validation experiments.

## 1.8 Schizophrenia GWAS SNPs

We utilized 1,648 SCZ GWAS SNPs (annotation  $PIP \geq 0.1$ ) and 25 mouse ATAC-seq datasets from Hook and McCallion, 2020. The benchmarking results are summarized in Supplementary Table 13.

The methods were run under the following settings:

- AdaLiftOver: threshold = 0.2. The chain file is “hg19.mm10.rbest.chain”
- bnMapper: Default parameters. The chain file is “hg19.mm10.rbest.chain”
- UCSC liftOver: The R function “rtracklayer::liftOver()”. The chain file is “hg19ToMm10.over.chain”
- EpiAlignment: window = 2 kb. GWAS SNPs from hg19 were converted to hg38 with UCSC liftOver using the chain file “hg19ToHg38.over.chain”. Due to the lack of BMD related orthologous epigenome data, we used orthologous cCRE data as the user inputted epigenomic signals in order to tune EpiAlignment fairly.

To provide support for the mapped GWAS SNPs, we asked whether ATAC-seq peaks of relevant cell types overlapped with the mapped GWAS SNPs more than expected by chance. Our calculations took into account background genomic characteristics such as sequence conservation as quantified by the PhyloP scores<sup>2</sup> and genomic coordinates as quantified by the chromosomes that the ATAC-seq peaks reside in. We first binned all the open chromatin regions<sup>3</sup> of the genome into intervals of 100 bp and stratified these with respect to their PhyloP scores discretized at 0.1 resolution for each chromosome separately. Then, we computed the empirical probability of overlap ( $p_i$ ) with the mapped GWAS SNPs within each strata  $S_i$ ,  $i = 1 \dots I$ , where index  $i$  runs over the PhyloP score grid and the numbers of chromosomes. Next, for a given ATAC-seq peak set of size  $P$ , we first calculated the expected proportion of overlap with the GWAS SNPs as  $p_0 = \frac{1}{P} \sum_p \sum_i I(p\text{-th peak is in strata } i) p_i$ . Using this null proportion, we evaluated the enrichment with a Binomial test that assessed whether the observed overlap of the ATAC-seq peak set with the mapped GWAS SNPs is larger than that can be explained by this expected proportion of overlap.

## 1.9 Hematopoiesis GWAS SNPs

We leveraged 10 blood-related mouse ATAC-seq peaks (Xiang *et al.*, 2020) and fine-mapped hematopoietic GWAS SNPs (Ulirsch *et al.*, 2019) with  $PIP \geq 0.1$  from 4 blood traits: MCV, MPV, Mono, Lymph. The settings of the methods compared and the enrichment analysis were the same as the SCZ GWAS case. The benchmarking results are summarized in Supplementary Table 14. The enrichment results for Mono (monocyte count) and MPV (mean platelet volume) are displayed in Supplementary Figure 10.

## 1.10 Bone Mineral Density GWAS SNPs

The promoter regions of BMD genes were defined as 2 kb upstream and 200 bp downstream of TSS. We utilized 1,097 fine-mapped BMD GWAS SNPs from Morris *et al.*, 2019 as well as 2,088 estimated BMD fine-mapped GWAS SNPs from the UK Biobank (SuSIE  $PIP \geq 0.1$ ). For negative controls, we utilized a comparable number of 3,601 BMI SNPs from the UK Biobank (SuSIE  $PIP \geq 0.05$ ). The settings of the methods compared and the enrichment analysis were the same as the SCZ GWAS case. The regions for enrichment analysis were the 52 BMD gene promoters and the constructed universe consisted of all orthologous gene promoters identified in Section 1.1. The results are summarized in Supplementary Table 15.

We further used 116,402 fine-mapped GWAS SNPs from the UK Biobank (SuSIE  $PIP \geq 0.001$ ). We didn't run EpiAlignment due to the lack of scalability of this method. The results are summarized in Supplementary Table 16.

---

<sup>2</sup>The PhyloP dataset was downloaded from <http://hgdownload.cse.ucsc.edu/goldenpath/mm10/phyloP60way/mm10.60way.phyloP60way.bw>

<sup>3</sup>The 100bp-binned open chromatin regions as the union of all target ATAC-seq peaks extended by 1 kb.

## 2 Supplementary Tables

Panel A: R liftOver (rtracklayer::liftOver) with Over chain file

|                       | <b>TP</b> | <b>FP</b> | <b>TN</b> | <b>FN</b> |
|-----------------------|-----------|-----------|-----------|-----------|
| <b>human to mouse</b> | 12,771    | 2,842     | 556       | 205       |
| <b>mouse to human</b> | 12,979    | 2,703     | 531       | 161       |

Panel B: R liftOver (rtracklayer::liftOver) with rbest chain file

|                       | <b>TP</b> | <b>FP</b> | <b>TN</b> | <b>FN</b> |
|-----------------------|-----------|-----------|-----------|-----------|
| <b>human to mouse</b> | 12,760    | 2,813     | 592       | 209       |
| <b>mouse to human</b> | 12,760    | 2,525     | 933       | 156       |

Panel C: UCSC liftOver with minMatch=0.1, and Over chain file

|                       | <b>TP</b> | <b>FP</b> | <b>TN</b> | <b>FN</b> |
|-----------------------|-----------|-----------|-----------|-----------|
| <b>human to mouse</b> | 12,431.52 | 2,758.24  | 776.56    | 407.68    |
| <b>mouse to human</b> | 12,767.60 | 2,540.56  | 644.64    | 421.20    |

Panel D: UCSC liftOver with minMatch=0.1, and rbest chain file

|                       | <b>TP</b> | <b>FP</b> | <b>TN</b> | <b>FN</b> |
|-----------------------|-----------|-----------|-----------|-----------|
| <b>human to mouse</b> | 12,380.64 | 2,681.72  | 886.76    | 424.88    |
| <b>mouse to human</b> | 12,519.80 | 2,361.48  | 1,068.56  | 424.16    |

Supplementary Table 1: Mapping of 16,374 orthologous gene promoters between human and mouse with R implementation of UCSC liftOver via rtracklayer::liftOver and UCSC liftOver command line tool under varying set of parameters and with two different chain files: Over and rbest. Parameter minMatch represents the minimum ratio of bases that must map for a successful liftOver (default of 0.1 as the most commonly used value for mapping between species). For panels C and D, the results are averaged over combinations of minChainT and minChainQ parameters that represent the minimum chain size in target and query genomes, respectively. These parameters were varied as: minChainT  $\in$  {0, 50, 100, 150, 200} and minChainQ  $\in$  {0, 50, 100, 150, 200}. Overall results were insensitive to the combinations of these two parameters (data not shown), hence, prompting averaging of the results across these combinations of these two parameters. The calculations of TP, FP, TN, and FN are carried out as described in Supplementary Materials Section 1.1.

|    | <b>Assay</b> | <b>Target</b> | <b>Tissue</b>   | <b>mouse file id</b> | <b>human file id</b> |
|----|--------------|---------------|-----------------|----------------------|----------------------|
| 1  | ChIP-seq     | H3K4me3       | heart           | ENCFF925JLJ.bed      | ENCFF685WYG.bed      |
| 2  | ChIP-seq     | H3K4me1       | heart           | ENCFF577SAP.bed      | ENCFF109AVD.bed      |
| 3  | ChIP-seq     | H3K27me3      | heart           | ENCFF337GMV.bed      | ENCFF594SIJ.bed      |
| 4  | ChIP-seq     | H3K36me3      | heart           | ENCFF412PEF.bed      | ENCFF501WXA.bed      |
| 5  | ChIP-seq     | H3K9me3       | heart           | ENCFF018ZTP.bed      | ENCFF472HHB.bed      |
| 6  | ChIP-seq     | H3K9ac        | heart           | ENCFF043BXJ.bed      | ENCFF305FQY.bed      |
| 7  | ChIP-seq     | H3K4me3       | liver           | ENCFF233NKJ.bed      | ENCFF178DYP.bed      |
| 8  | ChIP-seq     | H3K4me1       | liver           | ENCFF626UMI.bed      | ENCFF872NIB.bed      |
| 9  | ChIP-seq     | H3K27ac       | liver           | ENCFF734MGU.bed      | ENCFF805YRQ.bed      |
| 10 | ChIP-seq     | H3K27me3      | liver           | ENCFF290NCY.bed      | ENCFF977LFS.bed      |
| 11 | ChIP-seq     | H3K36me3      | liver           | ENCFF958ZWB.bed      | ENCFF050ODT.bed      |
| 12 | ChIP-seq     | H3K9me3       | liver           | ENCFF763XZB.bed      | ENCFF093NPF.bed      |
| 13 | ChIP-seq     | H3K9ac        | liver           | ENCFF025NBX.bed      | ENCFF766JJU.bed      |
| 14 | ChIP-seq     | H3K4me3       | kidney          | ENCFF870HWW.bed      | ENCFF917SIV.bed      |
| 15 | ChIP-seq     | H3K4me1       | kidney          | ENCFF661JHH.bed      | ENCFF224BUW.bed      |
| 16 | ChIP-seq     | H3K27me3      | kidney          | ENCFF357TDA.bed      | ENCFF775YUI.bed      |
| 17 | ChIP-seq     | H3K36me3      | kidney          | ENCFF219HDC.bed      | ENCFF839LUB.bed      |
| 18 | ChIP-seq     | H3K9me3       | kidney          | ENCFF616DMW.bed      | ENCFF163PII.bed      |
| 19 | ChIP-seq     | H3K9ac        | kidney          | ENCFF226CKB.bed      | ENCFF138PYK.bed      |
| 20 | ChIP-seq     | H3K4me3       | lung            | ENCFF142XFR.bed      | ENCFF254OZF.bed      |
| 21 | ChIP-seq     | H3K4me1       | lung            | ENCFF262JML.bed      | ENCFF908EUN.bed      |
| 22 | ChIP-seq     | H3K27ac       | lung            | ENCFF455ADY.bed      | ENCFF314QTE.bed      |
| 23 | ChIP-seq     | H3K27me3      | lung            | ENCFF536OYS.bed      | ENCFF112CDW.bed      |
| 24 | ChIP-seq     | H3K36me3      | lung            | ENCFF262QMM.bed      | ENCFF089HKW.bed      |
| 25 | ChIP-seq     | H3K9me3       | lung            | ENCFF737BJL.bed      | ENCFF284QKU.bed      |
| 26 | ChIP-seq     | H3K9ac        | lung            | ENCFF871DGI.bed      | ENCFF330TSX.bed      |
| 27 | ChIP-seq     | H3K4me3       | stomach         | ENCFF902SVE.bed      | ENCFF494BWU.bed      |
| 28 | ChIP-seq     | H3K4me1       | stomach         | ENCFF377USJ.bed      | ENCFF475EJU.bed      |
| 29 | ChIP-seq     | H3K27ac       | stomach         | ENCFF643VAF.bed      | ENCFF978AOD.bed      |
| 30 | ChIP-seq     | H3K27me3      | stomach         | ENCFF993YFO.bed      | ENCFF692HXY.bed      |
| 31 | ChIP-seq     | H3K36me3      | stomach         | ENCFF704KRU.bed      | ENCFF243EAW.bed      |
| 32 | ChIP-seq     | H3K9me3       | stomach         | ENCFF401WHJ.bed      | ENCFF299EII.bed      |
| 33 | ChIP-seq     | H3K4me3       | spleen          | ENCFF040ATH.bed      | ENCFF636LHJ.bed      |
| 34 | ChIP-seq     | H3K4me1       | spleen          | ENCFF332TVZ.bed      | ENCFF997KKX.bed      |
| 35 | ChIP-seq     | H3K27ac       | spleen          | ENCFF675SAZ.bed      | ENCFF805FFP.bed      |
| 36 | ChIP-seq     | H3K27me3      | spleen          | ENCFF472CRY.bed      | ENCFF867NGE.bed      |
| 37 | ChIP-seq     | H3K36me3      | spleen          | ENCFF962GUW.bed      | ENCFF593PUF.bed      |
| 38 | ChIP-seq     | H3K4me3       | thymus          | ENCFF462HWJ.bed      | ENCFF963LSO.bed      |
| 39 | ChIP-seq     | H3K4me1       | thymus          | ENCFF149ZSO.bed      | ENCFF821ZRD.bed      |
| 40 | ChIP-seq     | H3K27ac       | thymus          | ENCFF476TDY.bed      | ENCFF668BZJ.bed      |
| 41 | ChIP-seq     | H3K27me3      | thymus          | ENCFF497BVT.bed      | ENCFF641CCT.bed      |
| 42 | ChIP-seq     | H3K36me3      | thymus          | ENCFF394EHO.bed      | ENCFF869FKJ.bed      |
| 43 | ChIP-seq     | H3K4me3       | small intestine | ENCFF250OKJ.bed      | ENCFF638SMB.bed      |
| 44 | ChIP-seq     | H3K4me1       | small intestine | ENCFF061UOC.bed      | ENCFF377UAM.bed      |
| 45 | ChIP-seq     | H3K27ac       | small intestine | ENCFF371CEP.bed      | ENCFF074WDV.bed      |
| 46 | ChIP-seq     | H3K27me3      | small intestine | ENCFF359SCM.bed      | ENCFF644QDF.bed      |
| 47 | ChIP-seq     | H3K36me3      | small intestine | ENCFF841SYQ.bed      | ENCFF694AKL.bed      |
| 48 | ChIP-seq     | H3K4me3       | testis          | ENCFF582PBS.bed      | ENCFF244NRV.bed      |
| 49 | ChIP-seq     | H3K4me1       | testis          | ENCFF868HGX.bed      | ENCFF600MJO.bed      |

Continued on next page



**Supplementary Table 2 – continued from previous page**

|    | <b>Assay</b> | <b>Target</b> | <b>Tissue</b> | <b>mouse file id</b> | <b>human file id</b> |
|----|--------------|---------------|---------------|----------------------|----------------------|
| 50 | ChIP-seq     | H3K27ac       | testis        | ENCFF047JTI.bed      | ENCFF540YUQ.bed      |
| 51 | ChIP-seq     | H3K27me3      | testis        | ENCFF031KAC.bed      | ENCFF319CMK.bed      |
| 52 | ChIP-seq     | H3K36me3      | testis        | ENCFF187TKX.bed      | ENCFF469ASG.bed      |
| 53 | ChIP-seq     | H3K4me3       | placenta      | ENCFF296GDX.bed      | ENCFF829GCX.bed      |
| 54 | ChIP-seq     | H3K4me1       | placenta      | ENCFF499ASE.bed      | ENCFF867CRG.bed      |
| 55 | ChIP-seq     | H3K27ac       | placenta      | ENCFF226XOZ.bed      | ENCFF297NSU.bed      |
| 56 | ChIP-seq     | CTCF          | stomach       | ENCFF907XEG.bed      | ENCFF017NAF.bed      |
| 57 | ChIP-seq     | EP300         | stomach       | ENCFF132DDY.bed      | ENCFF099PQM.bed      |
| 58 | ChIP-seq     | CTCF          | spleen        | ENCFF089EWX.bed      | ENCFF645YCX.bed      |
| 59 | ChIP-seq     | POLR2A        | spleen        | ENCFF313QNI.bed      | ENCFF683YQZ.bed      |
| 60 | ChIP-seq     | CTCF          | testis        | ENCFF033UQX.bed      | ENCFF917CYG.bed      |
| 61 | ChIP-seq     | POLR2A        | testis        | ENCFF789JUX.bed      | ENCFF967TFR.bed      |
| 62 | DNase-seq    |               | heart         | ENCFF846XYQ.bed      | ENCFF861CQD.bed      |
| 63 | DNase-seq    |               | kidney        | ENCFF890GCF.bed      | ENCFF388NNQ.bed      |
| 64 | DNase-seq    |               | lung          | ENCFF459KBR.bed      | ENCFF691GQY.bed      |
| 65 | DNase-seq    |               | stomach       | ENCFF220GXC.bed      | ENCFF731YGM.bed      |
| 66 | DNase-seq    |               | spleen        | ENCFF343KXE.bed      | ENCFF523NCT.bed      |
| 67 | DNase-seq    |               | thymus        | ENCFF266KGB.bed      | ENCFF494PNZ.bed      |

Supplementary Table 2: The 67 matched ENCODE datasets between mouse and human. These datasets make up AdaLiftOver's default epigenome repertoire.

|    | TF      | human-K562 | mouse-MEL | human-GM12878 | mouse-CH12 |
|----|---------|------------|-----------|---------------|------------|
| 1  | BHLHE40 | Yes        | Yes       | Yes           | Yes        |
| 2  | CHD1    | Yes        | Yes       | Yes           | Yes        |
| 3  | CHD2    | Yes        | Yes       | Yes           | Yes        |
| 4  | CTCF    | Yes        | Yes       | Yes           | Yes        |
| 5  | E2F4    | Yes        | Yes       | Yes           | Yes        |
| 6  | ELF1    | Yes        | Yes       | Yes           | Yes        |
| 7  | EP300   | Yes        | Yes       | Yes           | Yes        |
| 8  | ETS1    | Yes        | Yes       | Yes           | Yes        |
| 9  | GATA1   | Yes        | Yes       | No            | No         |
| 10 | JUND    | Yes        | Yes       | Yes           | Yes        |
| 11 | MAFK    | Yes        | Yes       | No            | No         |
| 12 | MAX     | Yes        | Yes       | Yes           | Yes        |
| 13 | MAZ     | Yes        | Yes       | Yes           | Yes        |
| 14 | MEF2A   | Yes        | Yes       | Yes           | Yes        |
| 15 | MXI1    | Yes        | Yes       | Yes           | Yes        |
| 16 | MYC     | Yes        | Yes       | Yes           | Yes        |
| 17 | NRF1    | Yes        | Yes       | Yes           | Yes        |
| 18 | POLR2A  | Yes        | Yes       | Yes           | Yes        |
| 19 | RAD21   | Yes        | Yes       | Yes           | Yes        |
| 20 | RCOR1   | Yes        | Yes       | Yes           | Yes        |
| 21 | RDBP    | Yes        | Yes       | No            | No         |
| 22 | SIN3A   | Yes        | Yes       | Yes           | Yes        |
| 23 | SMC3    | Yes        | Yes       | Yes           | Yes        |
| 24 | TAL1    | Yes        | Yes       | No            | No         |
| 25 | TBP     | Yes        | Yes       | Yes           | Yes        |
| 26 | UBTF    | Yes        | Yes       | No            | No         |
| 27 | USF1    | Yes        | Yes       | Yes           | Yes        |
| 28 | USF2    | Yes        | Yes       | Yes           | Yes        |
| 29 | IRF4    | No         | No        | Yes           | Yes        |
| 30 | KAT2A   | No         | No        | Yes           | Yes        |
| 31 | PAX5    | No         | No        | Yes           | Yes        |
| 32 | TCF12   | No         | No        | Yes           | Yes        |

Supplementary Table 3: Matched human and mouse TF ChIP-seq datasets used for benchmarking.

|    | # peaks | # map | # overlap | precision | sample                    | method        |
|----|---------|-------|-----------|-----------|---------------------------|---------------|
| 1  | 43498   | 18834 | 6761      | 0.36      | BHLHE40 (CH12 vs GM12878) | AdaLiftOver   |
| 2  | 43498   | 32606 | 5970      | 0.18      | BHLHE40 (CH12 vs GM12878) | bnMapper      |
| 3  | 43498   | 37751 | 6059      | 0.16      | BHLHE40 (CH12 vs GM12878) | EpiAlignment  |
| 4  | 43498   | 33589 | 6152      | 0.18      | BHLHE40 (CH12 vs GM12878) | UCSC liftOver |
| 5  | 16325   | 8080  | 2911      | 0.36      | BHLHE40 (MEL vs K562)     | AdaLiftOver   |
| 6  | 16325   | 11716 | 2450      | 0.21      | BHLHE40 (MEL vs K562)     | bnMapper      |
| 7  | 16325   | 13803 | 2471      | 0.18      | BHLHE40 (MEL vs K562)     | EpiAlignment  |
| 8  | 16325   | 12076 | 2518      | 0.21      | BHLHE40 (MEL vs K562)     | UCSC liftOver |
| 9  | 11286   | 6984  | 1417      | 0.20      | CHD1 (CH12 vs GM12878)    | AdaLiftOver   |
| 10 | 11286   | 9209  | 1049      | 0.11      | CHD1 (CH12 vs GM12878)    | bnMapper      |
| 11 | 11286   | 10071 | 1118      | 0.11      | CHD1 (CH12 vs GM12878)    | EpiAlignment  |
| 12 | 11286   | 9640  | 1114      | 0.12      | CHD1 (CH12 vs GM12878)    | UCSC liftOver |
| 13 | 8170    | 6103  | 2269      | 0.37      | CHD1 (MEL vs K562)        | AdaLiftOver   |
| 14 | 8170    | 6686  | 1566      | 0.23      | CHD1 (MEL vs K562)        | bnMapper      |
| 15 | 8170    | 7336  | 1774      | 0.24      | CHD1 (MEL vs K562)        | EpiAlignment  |
| 16 | 8170    | 7036  | 1680      | 0.24      | CHD1 (MEL vs K562)        | UCSC liftOver |
| 17 | 19553   | 11302 | 5176      | 0.46      | CHD2 (CH12 vs GM12878)    | AdaLiftOver   |
| 18 | 19553   | 15579 | 4589      | 0.29      | CHD2 (CH12 vs GM12878)    | bnMapper      |
| 19 | 19553   | 17297 | 4633      | 0.27      | CHD2 (CH12 vs GM12878)    | EpiAlignment  |
| 20 | 19553   | 16135 | 4787      | 0.30      | CHD2 (CH12 vs GM12878)    | UCSC liftOver |
| 21 | 5062    | 3497  | 1727      | 0.49      | CHD2 (MEL vs K562)        | AdaLiftOver   |
| 22 | 5062    | 4009  | 1542      | 0.38      | CHD2 (MEL vs K562)        | bnMapper      |
| 23 | 5062    | 4428  | 1553      | 0.35      | CHD2 (MEL vs K562)        | EpiAlignment  |
| 24 | 5062    | 4194  | 1615      | 0.39      | CHD2 (MEL vs K562)        | UCSC liftOver |
| 25 | 60828   | 22812 | 13086     | 0.57      | CTCF (CH12 vs GM12878)    | AdaLiftOver   |
| 26 | 60828   | 36477 | 14918     | 0.41      | CTCF (CH12 vs GM12878)    | bnMapper      |
| 27 | 60828   | 48665 | 13944     | 0.29      | CTCF (CH12 vs GM12878)    | EpiAlignment  |
| 28 | 60828   | 37944 | 15395     | 0.41      | CTCF (CH12 vs GM12878)    | UCSC liftOver |
| 29 | 46608   | 18792 | 12015     | 0.64      | CTCF (MEL vs K562)        | AdaLiftOver   |
| 30 | 46608   | 26427 | 13862     | 0.52      | CTCF (MEL vs K562)        | bnMapper      |
| 31 | 46608   | 36707 | 12972     | 0.35      | CTCF (MEL vs K562)        | EpiAlignment  |
| 32 | 46608   | 27488 | 14299     | 0.52      | CTCF (MEL vs K562)        | UCSC liftOver |
| 33 | 5579    | 3863  | 1358      | 0.35      | E2F4 (CH12 vs GM12878)    | AdaLiftOver   |
| 34 | 5579    | 4477  | 1140      | 0.25      | E2F4 (CH12 vs GM12878)    | bnMapper      |
| 35 | 5579    | 4693  | 1207      | 0.26      | E2F4 (CH12 vs GM12878)    | UCSC liftOver |
| 36 | 4122    | 3319  | 1813      | 0.55      | E2F4 (MEL vs K562)        | AdaLiftOver   |
| 37 | 4122    | 3362  | 1509      | 0.45      | E2F4 (MEL vs K562)        | bnMapper      |
| 38 | 4122    | 3540  | 1590      | 0.45      | E2F4 (MEL vs K562)        | UCSC liftOver |
| 39 | 26680   | 16032 | 9681      | 0.60      | ELF1 (CH12 vs GM12878)    | AdaLiftOver   |
| 40 | 26680   | 20849 | 8384      | 0.40      | ELF1 (CH12 vs GM12878)    | bnMapper      |
| 41 | 26680   | 21699 | 8775      | 0.40      | ELF1 (CH12 vs GM12878)    | UCSC liftOver |
| 42 | 18949   | 12227 | 7511      | 0.61      | ELF1 (MEL vs K562)        | AdaLiftOver   |
| 43 | 18949   | 14536 | 6310      | 0.43      | ELF1 (MEL vs K562)        | bnMapper      |
| 44 | 18949   | 15086 | 6568      | 0.44      | ELF1 (MEL vs K562)        | UCSC liftOver |
| 45 | 33645   | 10803 | 1858      | 0.17      | EP300 (CH12 vs GM12878)   | AdaLiftOver   |
| 46 | 33645   | 24466 | 2364      | 0.10      | EP300 (CH12 vs GM12878)   | bnMapper      |
| 47 | 33645   | 25215 | 2411      | 0.10      | EP300 (CH12 vs GM12878)   | UCSC liftOver |
| 48 | 41335   | 14609 | 3117      | 0.21      | EP300 (MEL vs K562)       | AdaLiftOver   |
| 49 | 41335   | 27145 | 3028      | 0.11      | EP300 (MEL vs K562)       | bnMapper      |

Continued on next page

Supplementary Table 4 – continued from previous page

|    | # peaks | # map | # overlap | precision | sample                  | method        |
|----|---------|-------|-----------|-----------|-------------------------|---------------|
| 50 | 41335   | 28088 | 3120      | 0.11      | EP300 (MEL vs K562)     | UCSC liftOver |
| 51 | 29200   | 11825 | 3068      | 0.26      | ETS1 (CH12 vs GM12878)  | AdaLiftOver   |
| 52 | 29200   | 21951 | 2540      | 0.12      | ETS1 (CH12 vs GM12878)  | bnMapper      |
| 53 | 29200   | 22658 | 2667      | 0.12      | ETS1 (CH12 vs GM12878)  | UCSC liftOver |
| 54 | 38734   | 16858 | 4641      | 0.28      | ETS1 (MEL vs K562)      | AdaLiftOver   |
| 55 | 38734   | 26613 | 3440      | 0.13      | ETS1 (MEL vs K562)      | bnMapper      |
| 56 | 38734   | 27550 | 3593      | 0.13      | ETS1 (MEL vs K562)      | UCSC liftOver |
| 57 | 45252   | 14359 | 1146      | 0.08      | GATA1 (MEL vs K562)     | AdaLiftOver   |
| 58 | 45252   | 28062 | 1413      | 0.05      | GATA1 (MEL vs K562)     | bnMapper      |
| 59 | 45252   | 28968 | 1428      | 0.05      | GATA1 (MEL vs K562)     | UCSC liftOver |
| 60 | 41363   | 18562 | 3853      | 0.21      | IRF4 (CH12 vs GM12878)  | AdaLiftOver   |
| 61 | 41363   | 31104 | 3918      | 0.13      | IRF4 (CH12 vs GM12878)  | bnMapper      |
| 62 | 41363   | 32142 | 4040      | 0.13      | IRF4 (CH12 vs GM12878)  | UCSC liftOver |
| 63 | 15762   | 5550  | 618       | 0.11      | JUND (CH12 vs GM12878)  | AdaLiftOver   |
| 64 | 15762   | 11411 | 750       | 0.07      | JUND (CH12 vs GM12878)  | bnMapper      |
| 65 | 15762   | 11786 | 765       | 0.06      | JUND (CH12 vs GM12878)  | UCSC liftOver |
| 66 | 6674    | 2818  | 1073      | 0.38      | JUND (MEL vs K562)      | AdaLiftOver   |
| 67 | 6674    | 4355  | 988       | 0.23      | JUND (MEL vs K562)      | bnMapper      |
| 68 | 6674    | 4510  | 1017      | 0.23      | JUND (MEL vs K562)      | UCSC liftOver |
| 69 | 10569   | 7685  | 74        | 0.01      | KAT2A (CH12 vs GM12878) | AdaLiftOver   |
| 70 | 10569   | 8726  | 60        | 0.01      | KAT2A (CH12 vs GM12878) | bnMapper      |
| 71 | 10569   | 9152  | 63        | 0.01      | KAT2A (CH12 vs GM12878) | UCSC liftOver |
| 72 | 2351    | 943   | 281       | 0.30      | MAFK (MEL vs K562)      | AdaLiftOver   |
| 73 | 2351    | 1479  | 328       | 0.22      | MAFK (MEL vs K562)      | bnMapper      |
| 74 | 2351    | 1525  | 333       | 0.22      | MAFK (MEL vs K562)      | UCSC liftOver |
| 75 | 27057   | 15319 | 5860      | 0.38      | MAX (CH12 vs GM12878)   | AdaLiftOver   |
| 76 | 27057   | 20988 | 4783      | 0.23      | MAX (CH12 vs GM12878)   | bnMapper      |
| 77 | 27057   | 21865 | 5023      | 0.23      | MAX (CH12 vs GM12878)   | UCSC liftOver |
| 78 | 24511   | 14527 | 8186      | 0.56      | MAX (MEL vs K562)       | AdaLiftOver   |
| 79 | 24511   | 18210 | 6446      | 0.35      | MAX (MEL vs K562)       | bnMapper      |
| 80 | 24511   | 19038 | 6787      | 0.36      | MAX (MEL vs K562)       | UCSC liftOver |
| 81 | 17739   | 11632 | 6426      | 0.55      | MAZ (CH12 vs GM12878)   | AdaLiftOver   |
| 82 | 17739   | 14709 | 5622      | 0.38      | MAZ (CH12 vs GM12878)   | bnMapper      |
| 83 | 17739   | 15291 | 5899      | 0.39      | MAZ (CH12 vs GM12878)   | UCSC liftOver |
| 84 | 16851   | 11707 | 7695      | 0.66      | MAZ (MEL vs K562)       | AdaLiftOver   |
| 85 | 16851   | 13589 | 6631      | 0.49      | MAZ (MEL vs K562)       | bnMapper      |
| 86 | 16851   | 14166 | 6949      | 0.49      | MAZ (MEL vs K562)       | UCSC liftOver |
| 87 | 28178   | 13764 | 3342      | 0.24      | MEF2A (CH12 vs GM12878) | AdaLiftOver   |
| 88 | 28178   | 21854 | 3511      | 0.16      | MEF2A (CH12 vs GM12878) | bnMapper      |
| 89 | 28178   | 22638 | 3637      | 0.16      | MEF2A (CH12 vs GM12878) | UCSC liftOver |
| 90 | 4620    | 2065  | 294       | 0.14      | MEF2A (MEL vs K562)     | AdaLiftOver   |
| 91 | 4620    | 3361  | 301       | 0.09      | MEF2A (MEL vs K562)     | bnMapper      |
| 92 | 4620    | 3467  | 306       | 0.09      | MEF2A (MEL vs K562)     | UCSC liftOver |
| 93 | 23755   | 16096 | 8317      | 0.52      | MXI1 (CH12 vs GM12878)  | AdaLiftOver   |
| 94 | 23755   | 19488 | 6960      | 0.36      | MXI1 (CH12 vs GM12878)  | bnMapper      |
| 95 | 23755   | 20445 | 7400      | 0.36      | MXI1 (CH12 vs GM12878)  | UCSC liftOver |
| 96 | 29509   | 18473 | 4588      | 0.25      | MXI1 (MEL vs K562)      | AdaLiftOver   |
| 97 | 29509   | 22747 | 3529      | 0.16      | MXI1 (MEL vs K562)      | bnMapper      |

Continued on next page

**Supplementary Table 4 – continued from previous page**

|     | <b># peaks</b> | <b># map</b> | <b># overlap</b> | <b>precision</b> | <b>sample</b>            | <b>method</b> |
|-----|----------------|--------------|------------------|------------------|--------------------------|---------------|
| 98  | 29509          | 23869        | 3786             | 0.16             | MXI1 (MEL vs K562)       | UCSC liftOver |
| 99  | 26233          | 14407        | 2517             | 0.17             | MYC (CH12 vs GM12878)    | AdaLiftOver   |
| 100 | 26233          | 19896        | 1860             | 0.09             | MYC (CH12 vs GM12878)    | bnMapper      |
| 101 | 26233          | 20648        | 1967             | 0.10             | MYC (CH12 vs GM12878)    | UCSC liftOver |
| 102 | 23675          | 13283        | 7219             | 0.54             | MYC (MEL vs K562)        | AdaLiftOver   |
| 103 | 23675          | 17136        | 5759             | 0.34             | MYC (MEL vs K562)        | bnMapper      |
| 104 | 23675          | 17897        | 6055             | 0.34             | MYC (MEL vs K562)        | UCSC liftOver |
| 105 | 16163          | 11913        | 3667             | 0.31             | NRF1 (CH12 vs GM12878)   | AdaLiftOver   |
| 106 | 16163          | 13206        | 3173             | 0.24             | NRF1 (CH12 vs GM12878)   | bnMapper      |
| 107 | 16163          | 13823        | 3354             | 0.24             | NRF1 (CH12 vs GM12878)   | UCSC liftOver |
| 108 | 10599          | 8591         | 2700             | 0.31             | NRF1 (MEL vs K562)       | AdaLiftOver   |
| 109 | 10599          | 8861         | 2309             | 0.26             | NRF1 (MEL vs K562)       | bnMapper      |
| 110 | 10599          | 9254         | 2435             | 0.26             | NRF1 (MEL vs K562)       | UCSC liftOver |
| 111 | 194            | 58           | 23               | 0.40             | PAX5 (CH12 vs GM12878)   | AdaLiftOver   |
| 112 | 194            | 119          | 19               | 0.16             | PAX5 (CH12 vs GM12878)   | bnMapper      |
| 113 | 194            | 129          | 22               | 0.17             | PAX5 (CH12 vs GM12878)   | UCSC liftOver |
| 114 | 23696          | 16595        | 10486            | 0.63             | POLR2A (CH12 vs GM12878) | AdaLiftOver   |
| 115 | 23696          | 18700        | 9080             | 0.49             | POLR2A (CH12 vs GM12878) | bnMapper      |
| 116 | 23696          | 19889        | 9771             | 0.49             | POLR2A (CH12 vs GM12878) | UCSC liftOver |
| 117 | 21898          | 16012        | 3375             | 0.21             | POLR2A (MEL vs K562)     | AdaLiftOver   |
| 118 | 21898          | 16949        | 2761             | 0.16             | POLR2A (MEL vs K562)     | bnMapper      |
| 119 | 21898          | 18123        | 2943             | 0.16             | POLR2A (MEL vs K562)     | UCSC liftOver |
| 120 | 41545          | 16323        | 10413            | 0.64             | RAD21 (CH12 vs GM12878)  | AdaLiftOver   |
| 121 | 41545          | 26278        | 12384            | 0.47             | RAD21 (CH12 vs GM12878)  | bnMapper      |
| 122 | 41545          | 27311        | 12736            | 0.47             | RAD21 (CH12 vs GM12878)  | UCSC liftOver |
| 123 | 30908          | 14131        | 7430             | 0.53             | RAD21 (MEL vs K562)      | AdaLiftOver   |
| 124 | 30908          | 19912        | 8258             | 0.41             | RAD21 (MEL vs K562)      | bnMapper      |
| 125 | 30908          | 20695        | 8470             | 0.41             | RAD21 (MEL vs K562)      | UCSC liftOver |
| 126 | 10893          | 5326         | 918              | 0.17             | RCOR1 (CH12 vs GM12878)  | AdaLiftOver   |
| 127 | 10893          | 8549         | 893              | 0.10             | RCOR1 (CH12 vs GM12878)  | bnMapper      |
| 128 | 10893          | 8877         | 929              | 0.10             | RCOR1 (CH12 vs GM12878)  | UCSC liftOver |
| 129 | 25999          | 9929         | 678              | 0.07             | RCOR1 (MEL vs K562)      | AdaLiftOver   |
| 130 | 25999          | 17522        | 663              | 0.04             | RCOR1 (MEL vs K562)      | bnMapper      |
| 131 | 25999          | 18154        | 685              | 0.04             | RCOR1 (MEL vs K562)      | UCSC liftOver |
| 132 | 17422          | 13091        | 397              | 0.03             | RDBP (MEL vs K562)       | AdaLiftOver   |
| 133 | 17422          | 14093        | 311              | 0.02             | RDBP (MEL vs K562)       | bnMapper      |
| 134 | 17422          | 14906        | 345              | 0.02             | RDBP (MEL vs K562)       | UCSC liftOver |
| 135 | 27103          | 17821        | 7015             | 0.39             | SIN3A (CH12 vs GM12878)  | AdaLiftOver   |
| 136 | 27103          | 22261        | 5693             | 0.26             | SIN3A (CH12 vs GM12878)  | bnMapper      |
| 137 | 27103          | 23341        | 6077             | 0.26             | SIN3A (CH12 vs GM12878)  | UCSC liftOver |
| 138 | 37908          | 22270        | 8181             | 0.37             | SIN3A (MEL vs K562)      | AdaLiftOver   |
| 139 | 37908          | 28786        | 6175             | 0.21             | SIN3A (MEL vs K562)      | bnMapper      |
| 140 | 37908          | 30118        | 6583             | 0.22             | SIN3A (MEL vs K562)      | UCSC liftOver |
| 141 | 42669          | 17756        | 10953            | 0.62             | SMC3 (CH12 vs GM12878)   | AdaLiftOver   |
| 142 | 42669          | 28251        | 12299            | 0.44             | SMC3 (CH12 vs GM12878)   | bnMapper      |
| 143 | 42669          | 29363        | 12679            | 0.43             | SMC3 (CH12 vs GM12878)   | UCSC liftOver |
| 144 | 39493          | 16863        | 9277             | 0.55             | SMC3 (MEL vs K562)       | AdaLiftOver   |
| 145 | 39493          | 23913        | 9838             | 0.41             | SMC3 (MEL vs K562)       | bnMapper      |

Continued on next page

**Supplementary Table 4 – continued from previous page**

|     | <b># peaks</b> | <b># map</b> | <b># overlap</b> | <b>precision</b> | <b>sample</b>           | <b>method</b> |
|-----|----------------|--------------|------------------|------------------|-------------------------|---------------|
| 146 | 39493          | 24866        | 10116            | 0.41             | SMC3 (MEL vs K562)      | UCSC liftOver |
| 147 | 18204          | 6135         | 1045             | 0.17             | TAL1 (MEL vs K562)      | AdaLiftOver   |
| 148 | 18204          | 11767        | 1412             | 0.12             | TAL1 (MEL vs K562)      | bnMapper      |
| 149 | 18204          | 12163        | 1431             | 0.12             | TAL1 (MEL vs K562)      | UCSC liftOver |
| 150 | 20458          | 12056        | 5799             | 0.48             | TBP (CH12 vs GM12878)   | AdaLiftOver   |
| 151 | 20458          | 15237        | 4950             | 0.32             | TBP (CH12 vs GM12878)   | bnMapper      |
| 152 | 20458          | 15969        | 5222             | 0.33             | TBP (CH12 vs GM12878)   | UCSC liftOver |
| 153 | 26567          | 15495        | 7807             | 0.50             | TBP (MEL vs K562)       | AdaLiftOver   |
| 154 | 26567          | 18412        | 6140             | 0.33             | TBP (MEL vs K562)       | bnMapper      |
| 155 | 26567          | 19244        | 6447             | 0.34             | TBP (MEL vs K562)       | UCSC liftOver |
| 156 | 32474          | 18158        | 6907             | 0.38             | TCF12 (CH12 vs GM12878) | AdaLiftOver   |
| 157 | 32474          | 25471        | 6162             | 0.24             | TCF12 (CH12 vs GM12878) | bnMapper      |
| 158 | 32474          | 26585        | 6476             | 0.24             | TCF12 (CH12 vs GM12878) | UCSC liftOver |
| 159 | 5111           | 4406         | 1811             | 0.41             | UBTF (MEL vs K562)      | AdaLiftOver   |
| 160 | 5111           | 4436         | 1470             | 0.33             | UBTF (MEL vs K562)      | bnMapper      |
| 161 | 5111           | 4691         | 1562             | 0.33             | UBTF (MEL vs K562)      | UCSC liftOver |
| 162 | 8086           | 4116         | 1691             | 0.41             | USF1 (CH12 vs GM12878)  | AdaLiftOver   |
| 163 | 8086           | 6028         | 1612             | 0.27             | USF1 (CH12 vs GM12878)  | bnMapper      |
| 164 | 8086           | 6221         | 1660             | 0.27             | USF1 (CH12 vs GM12878)  | UCSC liftOver |
| 165 | 19341          | 9449         | 3071             | 0.33             | USF1 (MEL vs K562)      | AdaLiftOver   |
| 166 | 19341          | 13293        | 2733             | 0.21             | USF1 (MEL vs K562)      | bnMapper      |
| 167 | 19341          | 13795        | 2838             | 0.21             | USF1 (MEL vs K562)      | UCSC liftOver |
| 168 | 5662           | 2822         | 1036             | 0.37             | USF2 (CH12 vs GM12878)  | AdaLiftOver   |
| 169 | 5662           | 4266         | 981              | 0.23             | USF2 (CH12 vs GM12878)  | bnMapper      |
| 170 | 5662           | 4389         | 1010             | 0.23             | USF2 (CH12 vs GM12878)  | UCSC liftOver |
| 171 | 1310           | 863          | 514              | 0.60             | USF2 (MEL vs K562)      | AdaLiftOver   |
| 172 | 1310           | 1030         | 504              | 0.49             | USF2 (MEL vs K562)      | bnMapper      |
| 173 | 1310           | 1062         | 520              | 0.49             | USF2 (MEL vs K562)      | UCSC liftOver |

Supplementary Table 4: Benchmarking AdaLiftOver with the TF ChIP-seq datasets. Precision is computed as # of overlap divided by # of mapped.

|    | # peaks | # map | # overlap | precision | sample                                       | method        |
|----|---------|-------|-----------|-----------|----------------------------------------------|---------------|
| 1  | 20701   | 7035  | 4469      | 0.64      | CTCF (spleen vs spleen)                      | AdaLiftOver   |
| 2  | 20701   | 14743 | 7746      | 0.53      | CTCF (spleen vs spleen)                      | bnMapper      |
| 3  | 20701   | 14774 | 7914      | 0.54      | CTCF (spleen vs spleen)                      | UCSC liftOver |
| 4  | 74311   | 5460  | 1332      | 0.24      | CTCF (stomach vs stomach)                    | AdaLiftOver   |
| 5  | 74311   | 49803 | 14961     | 0.30      | CTCF (stomach vs stomach)                    | bnMapper      |
| 6  | 74311   | 49953 | 15657     | 0.31      | CTCF (stomach vs stomach)                    | UCSC liftOver |
| 7  | 24393   | 8093  | 5446      | 0.67      | CTCF (testis vs testis)                      | AdaLiftOver   |
| 8  | 24393   | 16430 | 8718      | 0.53      | CTCF (testis vs testis)                      | bnMapper      |
| 9  | 24393   | 16476 | 8984      | 0.55      | CTCF (testis vs testis)                      | UCSC liftOver |
| 10 | 6079    | 5916  | 512       | 0.09      | EP300 (stomach vs stomach)                   | AdaLiftOver   |
| 11 | 6079    | 5509  | 507       | 0.09      | EP300 (stomach vs stomach)                   | bnMapper      |
| 12 | 6079    | 5533  | 564       | 0.10      | EP300 (stomach vs stomach)                   | UCSC liftOver |
| 13 | 48349   | 24625 | 16168     | 0.66      | H3K27ac (liver vs liver)                     | AdaLiftOver   |
| 14 | 48349   | 37447 | 16846     | 0.45      | H3K27ac (liver vs liver)                     | bnMapper      |
| 15 | 48349   | 38030 | 18242     | 0.48      | H3K27ac (liver vs liver)                     | UCSC liftOver |
| 16 | 58076   | 30460 | 20461     | 0.67      | H3K27ac (lung vs lung)                       | AdaLiftOver   |
| 17 | 58076   | 50822 | 22048     | 0.43      | H3K27ac (lung vs lung)                       | bnMapper      |
| 18 | 58076   | 51287 | 23921     | 0.47      | H3K27ac (lung vs lung)                       | UCSC liftOver |
| 19 | 87631   | 35292 | 21013     | 0.60      | H3K27ac (placenta vs placenta)               | AdaLiftOver   |
| 20 | 87631   | 64448 | 23565     | 0.37      | H3K27ac (placenta vs placenta)               | bnMapper      |
| 21 | 87631   | 64812 | 26321     | 0.41      | H3K27ac (placenta vs placenta)               | UCSC liftOver |
| 22 | 67664   | 40568 | 29119     | 0.72      | H3K27ac (small intestine vs small intestine) | AdaLiftOver   |
| 23 | 67664   | 53611 | 29269     | 0.55      | H3K27ac (small intestine vs small intestine) | bnMapper      |
| 24 | 67664   | 54001 | 31737     | 0.59      | H3K27ac (small intestine vs small intestine) | UCSC liftOver |
| 25 | 46259   | 25388 | 17815     | 0.70      | H3K27ac (spleen vs spleen)                   | AdaLiftOver   |
| 26 | 46259   | 36702 | 18304     | 0.50      | H3K27ac (spleen vs spleen)                   | bnMapper      |
| 27 | 46259   | 36969 | 19747     | 0.53      | H3K27ac (spleen vs spleen)                   | UCSC liftOver |
| 28 | 53097   | 36290 | 27284     | 0.75      | H3K27ac (stomach vs stomach)                 | AdaLiftOver   |
| 29 | 53097   | 46325 | 27723     | 0.60      | H3K27ac (stomach vs stomach)                 | bnMapper      |
| 30 | 53097   | 46681 | 28833     | 0.62      | H3K27ac (stomach vs stomach)                 | UCSC liftOver |
| 31 | 44156   | 24837 | 18327     | 0.74      | H3K27ac (testis vs testis)                   | AdaLiftOver   |
| 32 | 44156   | 35097 | 18406     | 0.52      | H3K27ac (testis vs testis)                   | bnMapper      |
| 33 | 44156   | 35316 | 19912     | 0.56      | H3K27ac (testis vs testis)                   | UCSC liftOver |
| 34 | 26724   | 14715 | 10566     | 0.72      | H3K27ac (thymus vs thymus)                   | AdaLiftOver   |
| 35 | 26724   | 20787 | 10877     | 0.52      | H3K27ac (thymus vs thymus)                   | bnMapper      |
| 36 | 26724   | 20963 | 11819     | 0.56      | H3K27ac (thymus vs thymus)                   | UCSC liftOver |
| 37 | 53033   | 5709  | 2565      | 0.45      | H3K27me3 (heart vs heart)                    | AdaLiftOver   |
| 38 | 53033   | 42154 | 5290      | 0.13      | H3K27me3 (heart vs heart)                    | bnMapper      |
| 39 | 53033   | 42849 | 6312      | 0.15      | H3K27me3 (heart vs heart)                    | UCSC liftOver |
| 40 | 47485   | 6501  | 2741      | 0.42      | H3K27me3 (kidney vs kidney)                  | AdaLiftOver   |
| 41 | 47485   | 36347 | 5028      | 0.14      | H3K27me3 (kidney vs kidney)                  | bnMapper      |
| 42 | 47485   | 36814 | 5932      | 0.16      | H3K27me3 (kidney vs kidney)                  | UCSC liftOver |
| 43 | 59326   | 2576  | 1023      | 0.40      | H3K27me3 (liver vs liver)                    | AdaLiftOver   |
| 44 | 59326   | 43814 | 3897      | 0.09      | H3K27me3 (liver vs liver)                    | bnMapper      |
| 45 | 59326   | 44559 | 4652      | 0.10      | H3K27me3 (liver vs liver)                    | UCSC liftOver |
| 46 | 22174   | 1990  | 740       | 0.37      | H3K27me3 (lung vs lung)                      | AdaLiftOver   |

Continued on next page

**Supplementary Table 5 – continued from previous page**

|    | <b># peaks</b> | <b># map</b> | <b># overlap</b> | <b>precision</b> | <b>sample</b>                                 | <b>method</b> |
|----|----------------|--------------|------------------|------------------|-----------------------------------------------|---------------|
| 47 | 22174          | 18185        | 1829             | 0.10             | H3K27me3 (lung vs lung)                       | bnMapper      |
| 48 | 22174          | 18427        | 2077             | 0.11             | H3K27me3 (lung vs lung)                       | UCSC liftOver |
| 49 | 13291          | 11002        | 8425             | 0.77             | H3K27me3 (small intestine vs small intestine) | AdaLiftOver   |
| 50 | 13291          | 11580        | 8197             | 0.71             | H3K27me3 (small intestine vs small intestine) | bnMapper      |
| 51 | 13291          | 11630        | 8633             | 0.74             | H3K27me3 (small intestine vs small intestine) | UCSC liftOver |
| 52 | 13822          | 13589        | 1681             | 0.12             | H3K27me3 (spleen vs spleen)                   | AdaLiftOver   |
| 53 | 13822          | 12742        | 1637             | 0.13             | H3K27me3 (spleen vs spleen)                   | bnMapper      |
| 54 | 13822          | 12761        | 2198             | 0.17             | H3K27me3 (spleen vs spleen)                   | UCSC liftOver |
| 55 | 15476          | 13417        | 10395            | 0.77             | H3K27me3 (stomach vs stomach)                 | AdaLiftOver   |
| 56 | 15476          | 13510        | 9917             | 0.73             | H3K27me3 (stomach vs stomach)                 | bnMapper      |
| 57 | 15476          | 13608        | 10319            | 0.76             | H3K27me3 (stomach vs stomach)                 | UCSC liftOver |
| 58 | 1438           | 1427         | 55               | 0.04             | H3K27me3 (testis vs testis)                   | AdaLiftOver   |
| 59 | 1438           | 1401         | 53               | 0.04             | H3K27me3 (testis vs testis)                   | bnMapper      |
| 60 | 1438           | 1402         | 74               | 0.05             | H3K27me3 (testis vs testis)                   | UCSC liftOver |
| 61 | 8547           | 7870         | 6186             | 0.79             | H3K27me3 (thymus vs thymus)                   | AdaLiftOver   |
| 62 | 8547           | 7904         | 6044             | 0.76             | H3K27me3 (thymus vs thymus)                   | bnMapper      |
| 63 | 8547           | 7915         | 6323             | 0.80             | H3K27me3 (thymus vs thymus)                   | UCSC liftOver |
| 64 | 108803         | 7046         | 3202             | 0.45             | H3K36me3 (heart vs heart)                     | AdaLiftOver   |
| 65 | 108803         | 80093        | 8559             | 0.11             | H3K36me3 (heart vs heart)                     | bnMapper      |
| 66 | 108803         | 82146        | 11611            | 0.14             | H3K36me3 (heart vs heart)                     | UCSC liftOver |
| 67 | 108924         | 16941        | 8549             | 0.50             | H3K36me3 (kidney vs kidney)                   | AdaLiftOver   |
| 68 | 108924         | 82303        | 13040            | 0.16             | H3K36me3 (kidney vs kidney)                   | bnMapper      |
| 69 | 108924         | 84459        | 16874            | 0.20             | H3K36me3 (kidney vs kidney)                   | UCSC liftOver |
| 70 | 104288         | 49186        | 28110            | 0.57             | H3K36me3 (liver vs liver)                     | AdaLiftOver   |
| 71 | 104288         | 76899        | 27691            | 0.36             | H3K36me3 (liver vs liver)                     | bnMapper      |
| 72 | 104288         | 79115        | 33484            | 0.42             | H3K36me3 (liver vs liver)                     | UCSC liftOver |
| 73 | 85101          | 63998        | 37990            | 0.59             | H3K36me3 (lung vs lung)                       | AdaLiftOver   |
| 74 | 85101          | 64563        | 30659            | 0.47             | H3K36me3 (lung vs lung)                       | bnMapper      |
| 75 | 85101          | 65871        | 38156            | 0.58             | H3K36me3 (lung vs lung)                       | UCSC liftOver |
| 76 | 181271         | 35321        | 13285            | 0.38             | H3K36me3 (small intestine vs small intestine) | AdaLiftOver   |
| 77 | 181271         | 124086       | 22669            | 0.18             | H3K36me3 (small intestine vs small intestine) | bnMapper      |
| 78 | 181271         | 125187       | 32394            | 0.26             | H3K36me3 (small intestine vs small intestine) | UCSC liftOver |
| 79 | 124477         | 326          | 42               | 0.13             | H3K36me3 (spleen vs spleen)                   | AdaLiftOver   |
| 80 | 124477         | 87441        | 5618             | 0.06             | H3K36me3 (spleen vs spleen)                   | bnMapper      |
| 81 | 124477         | 88007        | 8272             | 0.09             | H3K36me3 (spleen vs spleen)                   | UCSC liftOver |
| 82 | 70664          | 63168        | 56707            | 0.90             | H3K36me3 (stomach vs stomach)                 | AdaLiftOver   |
| 83 | 70664          | 52563        | 44796            | 0.85             | H3K36me3 (stomach vs stomach)                 | bnMapper      |
| 84 | 70664          | 53293        | 46832            | 0.88             | H3K36me3 (stomach vs stomach)                 | UCSC liftOver |
| 85 | 13859          | 951          | 11               | 0.01             | H3K36me3 (testis vs testis)                   | AdaLiftOver   |
| 86 | 13859          | 9620         | 44               | 0.00             | H3K36me3 (testis vs testis)                   | bnMapper      |
| 87 | 13859          | 9650         | 72               | 0.01             | H3K36me3 (testis vs testis)                   | UCSC liftOver |
| 88 | 56413          | 52961        | 42185            | 0.80             | H3K36me3 (thymus vs thymus)                   | AdaLiftOver   |

Continued on next page



**Supplementary Table 5 – continued from previous page**

|     | <b># peaks</b> | <b># map</b> | <b># overlap</b> | <b>precision</b> | <b>sample</b>                                | <b>method</b> |
|-----|----------------|--------------|------------------|------------------|----------------------------------------------|---------------|
| 89  | 56413          | 45472        | 34525            | 0.76             | H3K36me3 (thymus vs thymus)                  | bnMapper      |
| 90  | 56413          | 46428        | 37798            | 0.81             | H3K36me3 (thymus vs thymus)                  | UCSC liftOver |
| 91  | 147429         | 44801        | 18643            | 0.42             | H3K4me1 (heart vs heart)                     | AdaLiftOver   |
| 92  | 147429         | 121473       | 31666            | 0.26             | H3K4me1 (heart vs heart)                     | bnMapper      |
| 93  | 147429         | 122555       | 35928            | 0.29             | H3K4me1 (heart vs heart)                     | UCSC liftOver |
| 94  | 142555         | 1594         | 308              | 0.19             | H3K4me1 (kidney vs kidney)                   | AdaLiftOver   |
| 95  | 142555         | 118411       | 7618             | 0.06             | H3K4me1 (kidney vs kidney)                   | bnMapper      |
| 96  | 142555         | 119290       | 9452             | 0.08             | H3K4me1 (kidney vs kidney)                   | UCSC liftOver |
| 97  | 102068         | 44916        | 25627            | 0.57             | H3K4me1 (liver vs liver)                     | AdaLiftOver   |
| 98  | 102068         | 78086        | 27912            | 0.36             | H3K4me1 (liver vs liver)                     | bnMapper      |
| 99  | 102068         | 79390        | 31514            | 0.40             | H3K4me1 (liver vs liver)                     | UCSC liftOver |
| 100 | 111510         | 41104        | 18160            | 0.44             | H3K4me1 (lung vs lung)                       | AdaLiftOver   |
| 101 | 111510         | 94619        | 24597            | 0.26             | H3K4me1 (lung vs lung)                       | bnMapper      |
| 102 | 111510         | 95324        | 30400            | 0.32             | H3K4me1 (lung vs lung)                       | UCSC liftOver |
| 103 | 109817         | 45281        | 24102            | 0.53             | H3K4me1 (placenta vs placenta)               | AdaLiftOver   |
| 104 | 109817         | 79597        | 29077            | 0.37             | H3K4me1 (placenta vs placenta)               | bnMapper      |
| 105 | 109817         | 79961        | 33156            | 0.41             | H3K4me1 (placenta vs placenta)               | UCSC liftOver |
| 106 | 55897          | 812          | 168              | 0.21             | H3K4me1 (small intestine vs small intestine) | AdaLiftOver   |
| 107 | 55897          | 41803        | 6118             | 0.15             | H3K4me1 (small intestine vs small intestine) | bnMapper      |
| 108 | 55897          | 42030        | 8234             | 0.20             | H3K4me1 (small intestine vs small intestine) | UCSC liftOver |
| 109 | 28445          | 12241        | 6499             | 0.53             | H3K4me1 (spleen vs spleen)                   | AdaLiftOver   |
| 110 | 28445          | 21377        | 7885             | 0.37             | H3K4me1 (spleen vs spleen)                   | bnMapper      |
| 111 | 28445          | 21486        | 9295             | 0.43             | H3K4me1 (spleen vs spleen)                   | UCSC liftOver |
| 112 | 62869          | 50040        | 39101            | 0.78             | H3K4me1 (stomach vs stomach)                 | AdaLiftOver   |
| 113 | 62869          | 53862        | 36747            | 0.68             | H3K4me1 (stomach vs stomach)                 | bnMapper      |
| 114 | 62869          | 54133        | 38622            | 0.71             | H3K4me1 (stomach vs stomach)                 | UCSC liftOver |
| 115 | 51879          | 17053        | 7656             | 0.45             | H3K4me1 (testis vs testis)                   | AdaLiftOver   |
| 116 | 51879          | 40286        | 12191            | 0.30             | H3K4me1 (testis vs testis)                   | bnMapper      |
| 117 | 51879          | 40463        | 14785            | 0.37             | H3K4me1 (testis vs testis)                   | UCSC liftOver |
| 118 | 92393          | 25993        | 12246            | 0.47             | H3K4me1 (thymus vs thymus)                   | AdaLiftOver   |
| 119 | 92393          | 66601        | 18757            | 0.28             | H3K4me1 (thymus vs thymus)                   | bnMapper      |
| 120 | 92393          | 67043        | 22291            | 0.33             | H3K4me1 (thymus vs thymus)                   | UCSC liftOver |
| 121 | 33069          | 15822        | 10439            | 0.66             | H3K4me3 (heart vs heart)                     | AdaLiftOver   |
| 122 | 33069          | 29663        | 11570            | 0.39             | H3K4me3 (heart vs heart)                     | bnMapper      |
| 123 | 33069          | 30065        | 12397            | 0.41             | H3K4me3 (heart vs heart)                     | UCSC liftOver |
| 124 | 25091          | 17270        | 13310            | 0.77             | H3K4me3 (kidney vs kidney)                   | AdaLiftOver   |
| 125 | 25091          | 22801        | 13812            | 0.61             | H3K4me3 (kidney vs kidney)                   | bnMapper      |
| 126 | 25091          | 23160        | 14471            | 0.62             | H3K4me3 (kidney vs kidney)                   | UCSC liftOver |
| 127 | 24533          | 14960        | 11269            | 0.75             | H3K4me3 (liver vs liver)                     | AdaLiftOver   |
| 128 | 24533          | 21634        | 11583            | 0.54             | H3K4me3 (liver vs liver)                     | bnMapper      |
| 129 | 24533          | 22038        | 12135            | 0.55             | H3K4me3 (liver vs liver)                     | UCSC liftOver |
| 130 | 22754          | 15971        | 12701            | 0.80             | H3K4me3 (lung vs lung)                       | AdaLiftOver   |
| 131 | 22754          | 20798        | 12926            | 0.62             | H3K4me3 (lung vs lung)                       | bnMapper      |
| 132 | 22754          | 21116        | 13393            | 0.63             | H3K4me3 (lung vs lung)                       | UCSC liftOver |
| 133 | 16300          | 14398        | 12822            | 0.89             | H3K4me3 (placenta vs placenta)               | AdaLiftOver   |

Continued on next page

**Supplementary Table 5 – continued from previous page**

|     | <b># peaks</b> | <b># map</b> | <b># overlap</b> | <b>precision</b> | <b>sample</b>                                | <b>method</b> |
|-----|----------------|--------------|------------------|------------------|----------------------------------------------|---------------|
| 134 | 16300          | 15374        | 12999            | 0.85             | H3K4me3 (placenta vs placenta)               | bnMapper      |
| 135 | 16300          | 15458        | 13304            | 0.86             | H3K4me3 (placenta vs placenta)               | UCSC liftOver |
| 136 | 33054          | 20188        | 14471            | 0.72             | H3K4me3 (small intestine vs small intestine) | AdaLiftOver   |
| 137 | 33054          | 28969        | 14389            | 0.50             | H3K4me3 (small intestine vs small intestine) | bnMapper      |
| 138 | 33054          | 29216        | 15631            | 0.54             | H3K4me3 (small intestine vs small intestine) | UCSC liftOver |
| 139 | 24957          | 19823        | 16824            | 0.85             | H3K4me3 (spleen vs spleen)                   | AdaLiftOver   |
| 140 | 24957          | 22187        | 16221            | 0.73             | H3K4me3 (spleen vs spleen)                   | bnMapper      |
| 141 | 24957          | 22357        | 17163            | 0.77             | H3K4me3 (spleen vs spleen)                   | UCSC liftOver |
| 142 | 23385          | 19506        | 17180            | 0.88             | H3K4me3 (stomach vs stomach)                 | AdaLiftOver   |
| 143 | 23385          | 21439        | 16951            | 0.79             | H3K4me3 (stomach vs stomach)                 | bnMapper      |
| 144 | 23385          | 21740        | 17420            | 0.80             | H3K4me3 (stomach vs stomach)                 | UCSC liftOver |
| 145 | 58275          | 26984        | 19438            | 0.72             | H3K4me3 (testis vs testis)                   | AdaLiftOver   |
| 146 | 58275          | 42998        | 18917            | 0.44             | H3K4me3 (testis vs testis)                   | bnMapper      |
| 147 | 58275          | 43547        | 20007            | 0.46             | H3K4me3 (testis vs testis)                   | UCSC liftOver |
| 148 | 24191          | 19759        | 17562            | 0.89             | H3K4me3 (thymus vs thymus)                   | AdaLiftOver   |
| 149 | 24191          | 21595        | 17252            | 0.80             | H3K4me3 (thymus vs thymus)                   | bnMapper      |
| 150 | 24191          | 21749        | 17679            | 0.81             | H3K4me3 (thymus vs thymus)                   | UCSC liftOver |
| 151 | 42875          | 30009        | 21216            | 0.71             | H3K9ac (heart vs heart)                      | AdaLiftOver   |
| 152 | 42875          | 37645        | 21610            | 0.57             | H3K9ac (heart vs heart)                      | bnMapper      |
| 153 | 42875          | 37931        | 23045            | 0.61             | H3K9ac (heart vs heart)                      | UCSC liftOver |
| 154 | 23426          | 16830        | 12932            | 0.77             | H3K9ac (kidney vs kidney)                    | AdaLiftOver   |
| 155 | 23426          | 21654        | 13055            | 0.60             | H3K9ac (kidney vs kidney)                    | bnMapper      |
| 156 | 23426          | 21857        | 13997            | 0.64             | H3K9ac (kidney vs kidney)                    | UCSC liftOver |
| 157 | 32198          | 16984        | 11774            | 0.69             | H3K9ac (liver vs liver)                      | AdaLiftOver   |
| 158 | 32198          | 26455        | 11691            | 0.44             | H3K9ac (liver vs liver)                      | bnMapper      |
| 159 | 32198          | 26844        | 12899            | 0.48             | H3K9ac (liver vs liver)                      | UCSC liftOver |
| 160 | 23821          | 18860        | 14543            | 0.77             | H3K9ac (lung vs lung)                        | AdaLiftOver   |
| 161 | 23821          | 21905        | 14536            | 0.66             | H3K9ac (lung vs lung)                        | bnMapper      |
| 162 | 23821          | 22098        | 15706            | 0.71             | H3K9ac (lung vs lung)                        | UCSC liftOver |
| 163 | 17382          | 118          | 46               | 0.39             | H3K9me3 (heart vs heart)                     | AdaLiftOver   |
| 164 | 17382          | 2959         | 67               | 0.02             | H3K9me3 (heart vs heart)                     | bnMapper      |
| 165 | 17382          | 3052         | 106              | 0.03             | H3K9me3 (heart vs heart)                     | UCSC liftOver |
| 166 | 15415          | 165          | 71               | 0.43             | H3K9me3 (kidney vs kidney)                   | AdaLiftOver   |
| 167 | 15415          | 2852         | 106              | 0.04             | H3K9me3 (kidney vs kidney)                   | bnMapper      |
| 168 | 15415          | 2910         | 157              | 0.05             | H3K9me3 (kidney vs kidney)                   | UCSC liftOver |
| 169 | 24183          | 260          | 131              | 0.50             | H3K9me3 (liver vs liver)                     | AdaLiftOver   |
| 170 | 24183          | 7005         | 352              | 0.05             | H3K9me3 (liver vs liver)                     | bnMapper      |
| 171 | 24183          | 7162         | 429              | 0.06             | H3K9me3 (liver vs liver)                     | UCSC liftOver |
| 172 | 3706           | 236          | 120              | 0.51             | H3K9me3 (lung vs lung)                       | AdaLiftOver   |
| 173 | 3706           | 773          | 151              | 0.20             | H3K9me3 (lung vs lung)                       | bnMapper      |
| 174 | 3706           | 785          | 207              | 0.26             | H3K9me3 (lung vs lung)                       | UCSC liftOver |
| 175 | 1191           | 171          | 114              | 0.67             | H3K9me3 (stomach vs stomach)                 | AdaLiftOver   |
| 176 | 1191           | 325          | 105              | 0.32             | H3K9me3 (stomach vs stomach)                 | bnMapper      |
| 177 | 1191           | 326          | 108              | 0.33             | H3K9me3 (stomach vs stomach)                 | UCSC liftOver |
| 178 | 160388         | 15613        | 8889             | 0.57             | (heart vs heart)                             | AdaLiftOver   |

Continued on next page

**Supplementary Table 5 – continued from previous page**

|     | <b># peaks</b> | <b># map</b> | <b># overlap</b> | <b>precision</b> | <b>sample</b>             | <b>method</b> |
|-----|----------------|--------------|------------------|------------------|---------------------------|---------------|
| 179 | 160388         | 97874        | 16958            | 0.17             | (heart vs heart)          | bnMapper      |
| 180 | 160388         | 98171        | 20020            | 0.20             | (heart vs heart)          | UCSC liftOver |
| 181 | 167449         | 29698        | 16066            | 0.54             | (kidney vs kidney)        | AdaLiftOver   |
| 182 | 167449         | 134566       | 29321            | 0.22             | (kidney vs kidney)        | bnMapper      |
| 183 | 167449         | 134807       | 35026            | 0.26             | (kidney vs kidney)        | UCSC liftOver |
| 184 | 181924         | 19216        | 10031            | 0.52             | (lung vs lung)            | AdaLiftOver   |
| 185 | 181924         | 139455       | 27629            | 0.20             | (lung vs lung)            | bnMapper      |
| 186 | 181924         | 139730       | 33879            | 0.24             | (lung vs lung)            | UCSC liftOver |
| 187 | 36640          | 16837        | 12225            | 0.73             | (spleen vs spleen)        | AdaLiftOver   |
| 188 | 36640          | 28232        | 13728            | 0.49             | (spleen vs spleen)        | bnMapper      |
| 189 | 36640          | 28291        | 15258            | 0.54             | (spleen vs spleen)        | UCSC liftOver |
| 190 | 102729         | 36714        | 23787            | 0.65             | (stomach vs stomach)      | AdaLiftOver   |
| 191 | 102729         | 78361        | 32318            | 0.41             | (stomach vs stomach)      | bnMapper      |
| 192 | 102729         | 78519        | 36524            | 0.47             | (stomach vs stomach)      | UCSC liftOver |
| 193 | 112029         | 13696        | 7662             | 0.56             | (thymus vs thymus)        | AdaLiftOver   |
| 194 | 112029         | 80121        | 17230            | 0.22             | (thymus vs thymus)        | bnMapper      |
| 195 | 112029         | 80343        | 19518            | 0.24             | (thymus vs thymus)        | UCSC liftOver |
| 196 | 9722           | 1024         | 456              | 0.45             | POLR2A (spleen vs spleen) | AdaLiftOver   |
| 197 | 9722           | 8938         | 2810             | 0.31             | POLR2A (spleen vs spleen) | bnMapper      |
| 198 | 9722           | 8953         | 3389             | 0.38             | POLR2A (spleen vs spleen) | UCSC liftOver |
| 199 | 17357          | 2652         | 1219             | 0.46             | POLR2A (testis vs testis) | AdaLiftOver   |
| 200 | 17357          | 14970        | 3496             | 0.23             | POLR2A (testis vs testis) | bnMapper      |
| 201 | 17357          | 15058        | 3910             | 0.26             | POLR2A (testis vs testis) | UCSC liftOver |

Supplementary Table 5: The benchmarking results for 3 orthologous mapping methods with human-mouse dataset. \*Number 10, 52, 58, 85 is calculated with threshold 0.01 rather than the default paramter 0.4 for AdaLiftOver due to the extremely low number of peaks in either target or query dataset.

|    | <b># peaks</b> | <b># map</b> | <b># overlap</b> | <b>precision</b> | <b>sample</b>                    | <b>method</b> |
|----|----------------|--------------|------------------|------------------|----------------------------------|---------------|
| 1  | 146494         | 4870         | 3059             | 0.63             | ATAC (brain vs brain)            | AdaLiftOver   |
| 2  | 146494         | 18521        | 1689             | 0.09             | ATAC (brain vs brain)            | bnMapper      |
| 3  | 146494         | 21818        | 3403             | 0.16             | ATAC (brain vs brain)            | UCSC liftOver |
| 4  | 68952          | 5080         | 3949             | 0.78             | ATAC (colon vs colon)            | AdaLiftOver   |
| 5  | 68952          | 8883         | 2008             | 0.23             | ATAC (colon vs colon)            | bnMapper      |
| 6  | 68952          | 10667        | 2958             | 0.28             | ATAC (colon vs colon)            | UCSC liftOver |
| 7  | 142005         | 5274         | 3807             | 0.72             | ATAC (heart vs heart)            | AdaLiftOver   |
| 8  | 142005         | 18304        | 2182             | 0.12             | ATAC (heart vs heart)            | bnMapper      |
| 9  | 142005         | 21967        | 3523             | 0.16             | ATAC (heart vs heart)            | UCSC liftOver |
| 10 | 118775         | 5689         | 3687             | 0.65             | ATAC (intestine vs intestine)    | AdaLiftOver   |
| 11 | 118775         | 15976        | 1839             | 0.12             | ATAC (intestine vs intestine)    | bnMapper      |
| 12 | 118775         | 18913        | 4032             | 0.21             | ATAC (intestine vs intestine)    | UCSC liftOver |
| 13 | 151319         | 6733         | 4970             | 0.74             | ATAC (kidney vs kidney)          | AdaLiftOver   |
| 14 | 151319         | 20382        | 2893             | 0.14             | ATAC (kidney vs kidney)          | bnMapper      |
| 15 | 151319         | 24423        | 4445             | 0.18             | ATAC (kidney vs kidney)          | UCSC liftOver |
| 16 | 99099          | 5956         | 4365             | 0.73             | ATAC (liver vs liver)            | AdaLiftOver   |
| 17 | 99099          | 11962        | 2092             | 0.17             | ATAC (liver vs liver)            | bnMapper      |
| 18 | 99099          | 14456        | 3300             | 0.23             | ATAC (liver vs liver)            | UCSC liftOver |
| 19 | 109504         | 920          | 557              | 0.61             | ATAC (muscle vs muscle)          | AdaLiftOver   |
| 20 | 109504         | 13607        | 689              | 0.05             | ATAC (muscle vs muscle)          | bnMapper      |
| 21 | 109504         | 16175        | 1797             | 0.11             | ATAC (muscle vs muscle)          | UCSC liftOver |
| 22 | 185631         | 375          | 195              | 0.52             | ATAC (skin vs skin)              | AdaLiftOver   |
| 23 | 185631         | 23265        | 617              | 0.03             | ATAC (skin vs skin)              | bnMapper      |
| 24 | 185631         | 28086        | 1803             | 0.06             | ATAC (skin vs skin)              | UCSC liftOver |
| 25 | 108665         | 5318         | 3860             | 0.73             | ATAC (spleen vs spleen)          | AdaLiftOver   |
| 26 | 108665         | 14468        | 1891             | 0.13             | ATAC (spleen vs spleen)          | bnMapper      |
| 27 | 108665         | 17496        | 2934             | 0.17             | ATAC (spleen vs spleen)          | UCSC liftOver |
| 28 | 152416         | 5767         | 3863             | 0.67             | ATAC (testis vs testis)          | AdaLiftOver   |
| 29 | 152417         | 21076        | 2299             | 0.11             | ATAC (testis vs testis)          | bnMapper      |
| 30 | 152417         | 25450        | 3916             | 0.15             | ATAC (testis vs testis)          | UCSC liftOver |
| 31 | 33282          | 2776         | 2067             | 0.74             | H3K27ac (brain vs brain)         | AdaLiftOver   |
| 32 | 33282          | 4535         | 1169             | 0.26             | H3K27ac (brain vs brain)         | bnMapper      |
| 33 | 33282          | 5518         | 1632             | 0.30             | H3K27ac (brain vs brain)         | UCSC liftOver |
| 34 | 64618          | 6707         | 5113             | 0.76             | H3K27ac (colon vs colon)         | AdaLiftOver   |
| 35 | 64618          | 8651         | 2977             | 0.34             | H3K27ac (colon vs colon)         | bnMapper      |
| 36 | 64618          | 10809        | 4140             | 0.38             | H3K27ac (colon vs colon)         | UCSC liftOver |
| 37 | 57632          | 6368         | 4987             | 0.78             | H3K27ac (heart vs heart)         | AdaLiftOver   |
| 38 | 57632          | 6141         | 2378             | 0.39             | H3K27ac (heart vs heart)         | bnMapper      |
| 39 | 57632          | 7491         | 3180             | 0.42             | H3K27ac (heart vs heart)         | UCSC liftOver |
| 40 | 50313          | 5399         | 4311             | 0.80             | H3K27ac (intestine vs intestine) | AdaLiftOver   |
| 41 | 50313          | 6766         | 2276             | 0.34             | H3K27ac (intestine vs intestine) | bnMapper      |
| 42 | 50313          | 8579         | 3252             | 0.38             | H3K27ac (intestine vs intestine) | UCSC liftOver |
| 43 | 121655         | 5810         | 4166             | 0.72             | H3K27ac (kidney vs kidney)       | AdaLiftOver   |
| 44 | 121655         | 15394        | 2419             | 0.16             | H3K27ac (kidney vs kidney)       | bnMapper      |
| 45 | 121655         | 18493        | 3610             | 0.20             | H3K27ac (kidney vs kidney)       | UCSC liftOver |
| 46 | 79944          | 6459         | 4806             | 0.74             | H3K27ac (liver vs liver)         | AdaLiftOver   |
| 47 | 79944          | 10303        | 2549             | 0.25             | H3K27ac (liver vs liver)         | bnMapper      |
| 48 | 79944          | 12472        | 3669             | 0.29             | H3K27ac (liver vs liver)         | UCSC liftOver |
| 49 | 107940         | 8263         | 6167             | 0.75             | H3K27ac (muscle vs muscle)       | AdaLiftOver   |

Continued on next page

**Supplementary Table 6 – continued from previous page**

|    | <b># peaks</b> | <b># map</b> | <b># overlap</b> | <b>precision</b> | <b>sample</b>                    | <b>method</b> |
|----|----------------|--------------|------------------|------------------|----------------------------------|---------------|
| 50 | 107940         | 10594        | 2998             | 0.28             | H3K27ac (muscle vs muscle)       | bnMapper      |
| 51 | 107940         | 12648        | 4103             | 0.32             | H3K27ac (muscle vs muscle)       | UCSC liftOver |
| 52 | 16937          | 3138         | 2785             | 0.89             | H3K27ac (skin vs skin)           | AdaLiftOver   |
| 53 | 16937          | 2774         | 1563             | 0.56             | H3K27ac (skin vs skin)           | bnMapper      |
| 54 | 16937          | 3421         | 2042             | 0.60             | H3K27ac (skin vs skin)           | UCSC liftOver |
| 55 | 39160          | 4123         | 3283             | 0.80             | H3K27ac (spleen vs spleen)       | AdaLiftOver   |
| 56 | 39160          | 5411         | 1725             | 0.32             | H3K27ac (spleen vs spleen)       | bnMapper      |
| 57 | 39160          | 6636         | 2391             | 0.36             | H3K27ac (spleen vs spleen)       | UCSC liftOver |
| 58 | 49799          | 4872         | 3839             | 0.79             | H3K27ac (testis vs testis)       | AdaLiftOver   |
| 59 | 49799          | 7249         | 1886             | 0.26             | H3K27ac (testis vs testis)       | bnMapper      |
| 60 | 49799          | 9039         | 2783             | 0.31             | H3K27ac (testis vs testis)       | UCSC liftOver |
| 61 | 23015          | 5966         | 5202             | 0.87             | H3K4me3 (brain vs brain)         | AdaLiftOver   |
| 62 | 23015          | 4487         | 2914             | 0.65             | H3K4me3 (brain vs brain)         | bnMapper      |
| 63 | 23015          | 5637         | 3868             | 0.69             | H3K4me3 (brain vs brain)         | UCSC liftOver |
| 64 | 40842          | 6204         | 5388             | 0.87             | H3K4me3 (colon vs colon)         | AdaLiftOver   |
| 65 | 40842          | 5854         | 2747             | 0.47             | H3K4me3 (colon vs colon)         | bnMapper      |
| 66 | 40842          | 7325         | 3732             | 0.51             | H3K4me3 (colon vs colon)         | UCSC liftOver |
| 67 | 21759          | 4328         | 3197             | 0.74             | H3K4me3 (heart vs heart)         | AdaLiftOver   |
| 68 | 21759          | 4390         | 1274             | 0.29             | H3K4me3 (heart vs heart)         | bnMapper      |
| 69 | 21759          | 5653         | 2422             | 0.43             | H3K4me3 (heart vs heart)         | UCSC liftOver |
| 70 | 30059          | 4755         | 3968             | 0.83             | H3K4me3 (intestine vs intestine) | AdaLiftOver   |
| 71 | 30059          | 5002         | 2098             | 0.42             | H3K4me3 (intestine vs intestine) | bnMapper      |
| 72 | 30059          | 6382         | 2988             | 0.47             | H3K4me3 (intestine vs intestine) | UCSC liftOver |
| 73 | 32734          | 5874         | 4801             | 0.82             | H3K4me3 (kidney vs kidney)       | AdaLiftOver   |
| 74 | 32734          | 5762         | 2305             | 0.40             | H3K4me3 (kidney vs kidney)       | bnMapper      |
| 75 | 32734          | 7298         | 3452             | 0.47             | H3K4me3 (kidney vs kidney)       | UCSC liftOver |
| 76 | 26386          | 5009         | 4053             | 0.81             | H3K4me3 (liver vs liver)         | AdaLiftOver   |
| 77 | 26386          | 4806         | 2068             | 0.43             | H3K4me3 (liver vs liver)         | bnMapper      |
| 78 | 26386          | 6173         | 3087             | 0.50             | H3K4me3 (liver vs liver)         | UCSC liftOver |
| 79 | 26538          | 6071         | 5296             | 0.87             | H3K4me3 (muscle vs muscle)       | AdaLiftOver   |
| 80 | 26538          | 4962         | 2768             | 0.56             | H3K4me3 (muscle vs muscle)       | bnMapper      |
| 81 | 26538          | 6313         | 3812             | 0.60             | H3K4me3 (muscle vs muscle)       | UCSC liftOver |
| 82 | 22004          | 5319         | 4804             | 0.90             | H3K4me3 (skin vs skin)           | AdaLiftOver   |
| 83 | 22004          | 4368         | 2640             | 0.60             | H3K4me3 (skin vs skin)           | bnMapper      |
| 84 | 22004          | 5638         | 3629             | 0.64             | H3K4me3 (skin vs skin)           | UCSC liftOver |
| 85 | 26152          | 5116         | 4369             | 0.85             | H3K4me3 (spleen vs spleen)       | AdaLiftOver   |
| 86 | 26152          | 5014         | 2316             | 0.46             | H3K4me3 (spleen vs spleen)       | bnMapper      |
| 87 | 26152          | 6551         | 3359             | 0.51             | H3K4me3 (spleen vs spleen)       | UCSC liftOver |
| 88 | 39555          | 6039         | 4914             | 0.81             | H3K4me3 (testis vs testis)       | AdaLiftOver   |
| 89 | 39555          | 6074         | 2695             | 0.44             | H3K4me3 (testis vs testis)       | bnMapper      |
| 90 | 39555          | 7776         | 3870             | 0.50             | H3K4me3 (testis vs testis)       | UCSC liftOver |

Supplementary Table 6: The benchmarking results for 3 orthologous mapping methods with human-zebrafish dataset.

|    | <b># peaks</b> | <b># map</b> | <b># overlap</b> | <b>precision</b> | <b>sample</b>               | <b>method</b> |
|----|----------------|--------------|------------------|------------------|-----------------------------|---------------|
| 1  | 21907          | 4807         | 2729             | 0.57             | DNaseSeq (muscle vs muscle) | AdaLiftOver   |
| 2  | 21907          | 7449         | 2408             | 0.32             | DNaseSeq (muscle vs muscle) | bnMapper      |
| 3  | 21907          | 9179         | 3763             | 0.41             | DNaseSeq (muscle vs muscle) | UCSC liftOver |
| 4  | 19890          | 8399         | 6745             | 0.80             | H3K27ac (liver vs liver)    | AdaLiftOver   |
| 5  | 19890          | 8004         | 4279             | 0.53             | H3K27ac (liver vs liver)    | bnMapper      |
| 6  | 19890          | 10722        | 6607             | 0.62             | H3K27ac (liver vs liver)    | UCSC liftOver |
| 7  | 13072          | 7005         | 5890             | 0.84             | H3K27ac (muscle vs muscle)  | AdaLiftOver   |
| 8  | 13072          | 5858         | 3726             | 0.64             | H3K27ac (muscle vs muscle)  | bnMapper      |
| 9  | 13072          | 8672         | 6197             | 0.71             | H3K27ac (muscle vs muscle)  | UCSC liftOver |
| 10 | 21960          | 8792         | 6802             | 0.77             | H3K27ac (spleen vs spleen)  | AdaLiftOver   |
| 11 | 21960          | 8485         | 4316             | 0.51             | H3K27ac (spleen vs spleen)  | bnMapper      |
| 12 | 21960          | 10876        | 6331             | 0.58             | H3K27ac (spleen vs spleen)  | UCSC liftOver |
| 13 | 17292          | 9167         | 6989             | 0.76             | H3K4me3 (liver vs liver)    | AdaLiftOver   |
| 14 | 17292          | 7641         | 3900             | 0.51             | H3K4me3 (liver vs liver)    | bnMapper      |
| 15 | 17292          | 11657        | 7113             | 0.61             | H3K4me3 (liver vs liver)    | UCSC liftOver |
| 16 | 12706          | 8719         | 8074             | 0.93             | H3K4me3 (muscle vs muscle)  | AdaLiftOver   |
| 17 | 12706          | 6288         | 4901             | 0.78             | H3K4me3 (muscle vs muscle)  | bnMapper      |
| 18 | 12706          | 9693         | 8122             | 0.84             | H3K4me3 (muscle vs muscle)  | UCSC liftOver |
| 19 | 16894          | 10660        | 8956             | 0.84             | H3K4me3 (spleen vs spleen)  | AdaLiftOver   |
| 20 | 16894          | 8365         | 5515             | 0.66             | H3K4me3 (spleen vs spleen)  | bnMapper      |
| 21 | 16894          | 11753        | 8541             | 0.73             | H3K4me3 (spleen vs spleen)  | UCSC liftOver |

Supplementary Table 7: The benchmarking results for 3 orthologous mapping methods with human-chicken dataset.

|    | <b># peaks</b> | <b># map</b> | <b># overlap</b> | <b>precision</b> | <b>sample</b>              | <b>method</b> |
|----|----------------|--------------|------------------|------------------|----------------------------|---------------|
| 1  | 21907          | 318          | 136              | 0.43             | ATAC (liver vs liver)      | AdaLiftOver   |
| 2  | 21907          | 13240        | 500              | 0.04             | ATAC (liver vs liver)      | bnMapper      |
| 3  | 21907          | 13453        | 676              | 0.05             | ATAC (liver vs liver)      | UCSC liftOver |
| 4  | 19890          | 303          | 127              | 0.42             | ATAC (spleen vs spleen)    | AdaLiftOver   |
| 5  | 19890          | 13098        | 404              | 0.03             | ATAC (spleen vs spleen)    | bnMapper      |
| 6  | 19890          | 13533        | 509              | 0.04             | ATAC (spleen vs spleen)    | UCSC liftOver |
| 7  | 13072          | 548          | 284              | 0.52             | H3K27ac (liver vs liver)   | AdaLiftOver   |
| 8  | 13072          | 8776         | 514              | 0.06             | H3K27ac (liver vs liver)   | bnMapper      |
| 9  | 13072          | 9151         | 633              | 0.07             | H3K27ac (liver vs liver)   | UCSC liftOver |
| 10 | 21960          | 626          | 314              | 0.50             | H3K27ac (muscle vs muscle) | AdaLiftOver   |
| 11 | 21960          | 13688        | 866              | 0.06             | H3K27ac (muscle vs muscle) | bnMapper      |
| 12 | 21960          | 14035        | 1027             | 0.07             | H3K27ac (muscle vs muscle) | UCSC liftOver |
| 13 | 17292          | 361          | 208              | 0.58             | H3K27ac (spleen vs spleen) | AdaLiftOver   |
| 14 | 17292          | 11348        | 364              | 0.03             | H3K27ac (spleen vs spleen) | bnMapper      |
| 15 | 17292          | 11738        | 430              | 0.04             | H3K27ac (spleen vs spleen) | UCSC liftOver |
| 16 | 12706          | 245          | 148              | 0.60             | H3K4me3 (liver vs liver)   | AdaLiftOver   |
| 17 | 12706          | 8201         | 211              | 0.03             | H3K4me3 (liver vs liver)   | bnMapper      |
| 18 | 12706          | 8459         | 256              | 0.03             | H3K4me3 (liver vs liver)   | UCSC liftOver |
| 19 | 16894          | 489          | 301              | 0.62             | H3K4me3 (muscle vs muscle) | AdaLiftOver   |
| 20 | 16894          | 10525        | 424              | 0.04             | H3K4me3 (muscle vs muscle) | bnMapper      |
| 21 | 16894          | 10775        | 520              | 0.05             | H3K4me3 (muscle vs muscle) | UCSC liftOver |
| 22 | 58199          | 15829        | 7201             | 0.45             | H3K4me3 (spleen vs spleen) | AdaLiftOver   |
| 23 | 58199          | 52337        | 13824            | 0.26             | H3K4me3 (spleen vs spleen) | bnMapper      |
| 24 | 58199          | 52936        | 14136            | 0.27             | H3K4me3 (spleen vs spleen) | UCSC liftOver |

Supplementary Table 8: The benchmarking results for 3 orthologous mapping methods with human-cow dataset.

|    | <b># peaks</b> | <b># map</b> | <b># overlap</b> | <b>precision</b> | <b>sample</b>              | <b>method</b> |
|----|----------------|--------------|------------------|------------------|----------------------------|---------------|
| 1  | 78788          | 29537        | 15669            | 0.53             | H3K27ac (brain vs brain)   | AdaLiftOver   |
| 2  | 78788          | 74948        | 19325            | 0.26             | H3K27ac (brain vs brain)   | bnMapper      |
| 3  | 78788          | 75619        | 21210            | 0.28             | H3K27ac (brain vs brain)   | UCSC liftOver |
| 4  | 68684          | 42579        | 32924            | 0.77             | H3K27ac (heart vs heart)   | AdaLiftOver   |
| 5  | 68684          | 65040        | 38666            | 0.59             | H3K27ac (heart vs heart)   | bnMapper      |
| 6  | 68684          | 65669        | 40744            | 0.62             | H3K27ac (heart vs heart)   | UCSC liftOver |
| 7  | 87557          | 41885        | 23925            | 0.57             | H3K27ac (liver vs liver)   | AdaLiftOver   |
| 8  | 87557          | 81352        | 31023            | 0.38             | H3K27ac (liver vs liver)   | bnMapper      |
| 9  | 87557          | 82157        | 34313            | 0.42             | H3K27ac (liver vs liver)   | UCSC liftOver |
| 10 | 76453          | 44898        | 29593            | 0.66             | H3K27ac (muscle vs muscle) | AdaLiftOver   |
| 11 | 76453          | 72006        | 34450            | 0.48             | H3K27ac (muscle vs muscle) | bnMapper      |
| 12 | 76453          | 72648        | 37312            | 0.51             | H3K27ac (muscle vs muscle) | UCSC liftOver |
| 13 | 27094          | 23403        | 18851            | 0.81             | H3K4me3 (brain vs brain)   | AdaLiftOver   |
| 14 | 27094          | 25820        | 19083            | 0.74             | H3K4me3 (brain vs brain)   | bnMapper      |
| 15 | 27094          | 26271        | 19745            | 0.75             | H3K4me3 (brain vs brain)   | UCSC liftOver |
| 16 | 26469          | 16619        | 11340            | 0.68             | H3K4me3 (heart vs heart)   | AdaLiftOver   |
| 17 | 26469          | 25257        | 12370            | 0.49             | H3K4me3 (heart vs heart)   | bnMapper      |
| 18 | 26469          | 25672        | 13138            | 0.51             | H3K4me3 (heart vs heart)   | UCSC liftOver |
| 19 | 28494          | 20256        | 13270            | 0.66             | H3K4me3 (liver vs liver)   | AdaLiftOver   |
| 20 | 28494          | 26780        | 13665            | 0.51             | H3K4me3 (liver vs liver)   | bnMapper      |
| 21 | 28494          | 27276        | 14478            | 0.53             | H3K4me3 (liver vs liver)   | UCSC liftOver |
| 22 | 28104          | 22805        | 18994            | 0.83             | H3K4me3 (muscle vs muscle) | AdaLiftOver   |
| 23 | 28104          | 26815        | 19238            | 0.72             | H3K4me3 (muscle vs muscle) | bnMapper      |
| 24 | 28104          | 27277        | 20216            | 0.74             | H3K4me3 (muscle vs muscle) | UCSC liftOver |

Supplementary Table 9: The benchmarking results for 3 orthologous mapping methods with human-horse dataset.



|    | <b># peaks</b> | <b># map</b> | <b># overlap</b> | <b>precision</b> | <b>sample</b>                    | <b>method</b> |
|----|----------------|--------------|------------------|------------------|----------------------------------|---------------|
| 1  | 69542          | 25848        | 16943            | 0.66             | ATAC (liver vs liver)            | AdaLiftOver   |
| 2  | 69542          | 61376        | 22914            | 0.37             | ATAC (liver vs liver)            | bnMapper      |
| 3  | 69542          | 63938        | 25271            | 0.40             | ATAC (liver vs liver)            | UCSC liftOver |
| 4  | 18463          | 12950        | 9529             | 0.74             | H3K27ac (brain vs brain)         | AdaLiftOver   |
| 5  | 18463          | 16606        | 9149             | 0.55             | H3K27ac (brain vs brain)         | bnMapper      |
| 6  | 18463          | 18183        | 10489            | 0.58             | H3K27ac (brain vs brain)         | UCSC liftOver |
| 7  | 29441          | 21922        | 18961            | 0.86             | H3K27ac (heart vs heart)         | AdaLiftOver   |
| 8  | 29441          | 26677        | 19343            | 0.73             | H3K27ac (heart vs heart)         | bnMapper      |
| 9  | 29441          | 28616        | 21274            | 0.74             | H3K27ac (heart vs heart)         | UCSC liftOver |
| 10 | 29721          | 21831        | 17503            | 0.80             | H3K27ac (intestine vs intestine) | AdaLiftOver   |
| 11 | 29721          | 26423        | 17290            | 0.65             | H3K27ac (intestine vs intestine) | bnMapper      |
| 12 | 29721          | 28740        | 19546            | 0.68             | H3K27ac (intestine vs intestine) | UCSC liftOver |
| 13 | 27773          | 19743        | 15072            | 0.76             | H3K27ac (kidney vs kidney)       | AdaLiftOver   |
| 14 | 27773          | 24838        | 14959            | 0.60             | H3K27ac (kidney vs kidney)       | bnMapper      |
| 15 | 27773          | 26969        | 16902            | 0.63             | H3K27ac (kidney vs kidney)       | UCSC liftOver |
| 16 | 46061          | 23392        | 16470            | 0.70             | H3K27ac (liver vs liver)         | AdaLiftOver   |
| 17 | 46061          | 40701        | 18269            | 0.45             | H3K27ac (liver vs liver)         | bnMapper      |
| 18 | 46061          | 43456        | 20656            | 0.48             | H3K27ac (liver vs liver)         | UCSC liftOver |
| 19 | 32101          | 22625        | 17799            | 0.79             | H3K27ac (muscle vs muscle)       | AdaLiftOver   |
| 20 | 32101          | 28981        | 18412            | 0.64             | H3K27ac (muscle vs muscle)       | bnMapper      |
| 21 | 32101          | 31056        | 20517            | 0.66             | H3K27ac (muscle vs muscle)       | UCSC liftOver |
| 22 | 30072          | 17216        | 11941            | 0.69             | H3K27ac (spleen vs spleen)       | AdaLiftOver   |
| 23 | 30072          | 26480        | 11861            | 0.45             | H3K27ac (spleen vs spleen)       | bnMapper      |
| 24 | 30072          | 28771        | 13666            | 0.47             | H3K27ac (spleen vs spleen)       | UCSC liftOver |
| 25 | 12359          | 12151        | 11903            | 0.98             | H3K4me3 (brain vs brain)         | AdaLiftOver   |
| 26 | 12359          | 10694        | 10468            | 0.98             | H3K4me3 (brain vs brain)         | bnMapper      |
| 27 | 12359          | 12182        | 11931            | 0.98             | H3K4me3 (brain vs brain)         | UCSC liftOver |
| 28 | 12815          | 11485        | 9128             | 0.79             | H3K4me3 (heart vs heart)         | AdaLiftOver   |
| 29 | 12815          | 11129        | 8413             | 0.76             | H3K4me3 (heart vs heart)         | bnMapper      |
| 30 | 12815          | 12608        | 9684             | 0.77             | H3K4me3 (heart vs heart)         | UCSC liftOver |
| 31 | 12953          | 11995        | 10770            | 0.90             | H3K4me3 (intestine vs intestine) | AdaLiftOver   |
| 32 | 12953          | 11200        | 9704             | 0.87             | H3K4me3 (intestine vs intestine) | bnMapper      |
| 33 | 12953          | 12739        | 11160            | 0.88             | H3K4me3 (intestine vs intestine) | UCSC liftOver |
| 34 | 11596          | 11178        | 10580            | 0.95             | H3K4me3 (kidney vs kidney)       | AdaLiftOver   |
| 35 | 11596          | 9998         | 9375             | 0.94             | H3K4me3 (kidney vs kidney)       | bnMapper      |
| 36 | 11596          | 11444        | 10759            | 0.94             | H3K4me3 (kidney vs kidney)       | UCSC liftOver |
| 37 | 13265          | 12276        | 10470            | 0.85             | H3K4me3 (liver vs liver)         | AdaLiftOver   |
| 38 | 13265          | 11450        | 9467             | 0.83             | H3K4me3 (liver vs liver)         | bnMapper      |
| 39 | 13265          | 13040        | 10907            | 0.84             | H3K4me3 (liver vs liver)         | UCSC liftOver |
| 40 | 13289          | 12812        | 12325            | 0.96             | H3K4me3 (muscle vs muscle)       | AdaLiftOver   |
| 41 | 13289          | 11512        | 10957            | 0.95             | H3K4me3 (muscle vs muscle)       | bnMapper      |
| 42 | 13289          | 13083        | 12476            | 0.95             | H3K4me3 (muscle vs muscle)       | UCSC liftOver |
| 43 | 12575          | 11587        | 10799            | 0.93             | H3K4me3 (spleen vs spleen)       | AdaLiftOver   |
| 44 | 12575          | 10750        | 9644             | 0.90             | H3K4me3 (spleen vs spleen)       | bnMapper      |
| 45 | 12575          | 12331        | 11126            | 0.90             | H3K4me3 (spleen vs spleen)       | UCSC liftOver |

Supplementary Table 10: The benchmarking results for 3 orthologous mapping methods with human-pig dataset.

|   | <b># peaks</b> | <b># map</b> | <b># overlap</b> | <b>precision</b> | <b>sample</b>                  | <b>method</b> |
|---|----------------|--------------|------------------|------------------|--------------------------------|---------------|
| 1 | 39958          | 23202        | 19681            | 0.85             | H3K4me3 (heart vs heart)       | AdaLiftOver   |
| 2 | 39958          | 32283        | 19592            | 0.61             | H3K4me3 (heart vs heart)       | bnMapper      |
| 3 | 39958          | 33284        | 22776            | 0.68             | H3K4me3 (heart vs heart)       | UCSC liftOver |
| 4 | 16980          | 12952        | 11778            | 0.91             | H3K4me3 (liver vs liver)       | AdaLiftOver   |
| 5 | 16980          | 13667        | 11477            | 0.84             | H3K4me3 (liver vs liver)       | bnMapper      |
| 6 | 16980          | 14607        | 12481            | 0.85             | H3K4me3 (liver vs liver)       | UCSC liftOver |
| 7 | 37185          | 20351        | 11604            | 0.57             | H3K4me3 (pancreas vs pancreas) | AdaLiftOver   |
| 8 | 37185          | 29093        | 11614            | 0.40             | H3K4me3 (pancreas vs pancreas) | bnMapper      |
| 9 | 37185          | 30399        | 14084            | 0.46             | H3K4me3 (pancreas vs pancreas) | UCSC liftOver |

Supplementary Table 11: The benchmarking results for 3 orthologous mapping methods with human-rat dataset.

| Methods                                       | Precision: mean and s.e. |         |      |       |      |       |      |       |      |       |      |       |      |           | Run time | Memory |             |                  |
|-----------------------------------------------|--------------------------|---------|------|-------|------|-------|------|-------|------|-------|------|-------|------|-----------|----------|--------|-------------|------------------|
|                                               | ENCODE TF ChIP-seq       | Chicken |      | Cow   |      | Horse |      | Mouse |      | Pig   |      | Rat   |      | Zebrafish |          |        |             |                  |
| AdaLiftOver                                   | 0.38                     | 0.023   | 0.79 | 0.042 | 0.51 | 0.027 | 0.69 | 0.038 | 0.60 | 0.022 | 0.82 | 0.026 | 0.78 | 0.104     | 0.76     | 0.016  | ~20 minutes | 3.4G             |
| bnMapper (Denas <i>et al.</i> , 2015)         | 0.26                     | 0.018   | 0.56 | 0.055 | 0.07 | 0.028 | 0.52 | 0.057 | 0.38 | 0.029 | 0.71 | 0.051 | 0.62 | 0.127     | 0.3      | 0.031  | ~10 minutes | 336M             |
| EpiAlignment (Lu <i>et al.</i> , 2019)        | 0.23                     | 0.027   | -    | -     | -    | -     | -    | -     | -    | -     | -    | -     | -    | -         | -        | -      | ~3 hours    | -(Run on WebApp) |
| UCSC liftOver (Hinrichs <i>et al.</i> , 2006) | 0.26                     | 0.019   | 0.64 | 0.051 | 0.08 | 0.027 | 0.54 | 0.055 | 0.42 | 0.029 | 0.73 | 0.048 | 0.67 | 0.113     | 0.35     | 0.031  | ~10 seconds | 1.6G             |

Supplementary Table 12: Comparison among existing orthologues mapping methods with case studies in Section 3.1. For each case study, mean and standard error of precision across all the benchmarking instances are reported. Values for EpiAlignment are calculated on a subset of the samples as noted in Section 3.1.

|    | <b># map</b> | <b># overlap</b> | <b>precision</b> | <b>method</b> | <b>sample</b>            |
|----|--------------|------------------|------------------|---------------|--------------------------|
| 1  | 612          | 16               | 0.03             | AdaLiftOver   | Microglia                |
| 2  | 612          | 12               | 0.02             | AdaLiftOver   | Astrocytes*              |
| 3  | 612          | 13               | 0.02             | AdaLiftOver   | Cones (Blue)             |
| 4  | 612          | 23               | 0.04             | AdaLiftOver   | CD4 T-cells              |
| 5  | 612          | 22               | 0.04             | AdaLiftOver   | CD8 T-cells              |
| 6  | 612          | 57               | 0.09             | AdaLiftOver   | Excitatory Camk2a        |
| 7  | 612          | 12               | 0.02             | AdaLiftOver   | Inhibitory PV            |
| 8  | 612          | 16               | 0.03             | AdaLiftOver   | Inhibitory VIP           |
| 9  | 612          | 105              | 0.17             | AdaLiftOver   | Excitatory Layers II-III |
| 10 | 612          | 69               | 0.11             | AdaLiftOver   | Excitatory Layer VI*     |
| 11 | 612          | 97               | 0.16             | AdaLiftOver   | Excitatory DG*           |
| 12 | 612          | 105              | 0.17             | AdaLiftOver   | Excitatory Layers II-V*  |
| 13 | 612          | 21               | 0.03             | AdaLiftOver   | Embryonic DA forebrain   |
| 14 | 612          | 113              | 0.18             | AdaLiftOver   | Inhibitory Gad2          |
| 15 | 612          | 14               | 0.02             | AdaLiftOver   | Cones (Green)            |
| 16 | 612          | 64               | 0.10             | AdaLiftOver   | Inhibitory*              |
| 17 | 612          | 73               | 0.12             | AdaLiftOver   | Inhibitory MSN*          |
| 18 | 612          | 20               | 0.03             | AdaLiftOver   | Embryonic DA midbrain    |
| 19 | 612          | 12               | 0.02             | AdaLiftOver   | Microglia*               |
| 20 | 612          | 17               | 0.03             | AdaLiftOver   | Neun negative            |
| 21 | 612          | 117              | 0.19             | AdaLiftOver   | Excitatory Layer VI      |
| 22 | 612          | 11               | 0.02             | AdaLiftOver   | Oligodendrocytes*        |
| 23 | 612          | 113              | 0.18             | AdaLiftOver   | Excitatory Layer V       |
| 24 | 612          | 9                | 0.01             | AdaLiftOver   | Rods                     |
| 25 | 612          | 103              | 0.17             | AdaLiftOver   | Excitatory Layer IV      |
| 26 | 681          | 8                | 0.01             | bnMapper      | Microglia                |
| 27 | 681          | 8                | 0.01             | bnMapper      | Astrocytes*              |
| 28 | 681          | 7                | 0.01             | bnMapper      | Cones (Blue)             |
| 29 | 681          | 14               | 0.02             | bnMapper      | CD4 T-cells              |
| 30 | 681          | 15               | 0.02             | bnMapper      | CD8 T-cells              |
| 31 | 681          | 71               | 0.10             | bnMapper      | Excitatory Camk2a        |
| 32 | 681          | 10               | 0.01             | bnMapper      | Inhibitory PV            |
| 33 | 681          | 12               | 0.02             | bnMapper      | Inhibitory VIP           |
| 34 | 681          | 102              | 0.15             | bnMapper      | Excitatory Layers II-III |
| 35 | 681          | 75               | 0.11             | bnMapper      | Excitatory Layer VI*     |
| 36 | 681          | 108              | 0.16             | bnMapper      | Excitatory DG*           |
| 37 | 681          | 108              | 0.16             | bnMapper      | Excitatory Layers II-V*  |
| 38 | 681          | 16               | 0.02             | bnMapper      | Embryonic DA forebrain   |
| 39 | 681          | 97               | 0.14             | bnMapper      | Inhibitory Gad2          |
| 40 | 681          | 7                | 0.01             | bnMapper      | Cones (Green)            |
| 41 | 681          | 57               | 0.08             | bnMapper      | Inhibitory*              |
| 42 | 681          | 66               | 0.10             | bnMapper      | Inhibitory MSN*          |
| 43 | 681          | 14               | 0.02             | bnMapper      | Embryonic DA midbrain    |
| 44 | 681          | 5                | 0.01             | bnMapper      | Microglia*               |
| 45 | 681          | 12               | 0.02             | bnMapper      | Neun negative            |
| 46 | 681          | 107              | 0.16             | bnMapper      | Excitatory Layer VI      |
| 47 | 681          | 7                | 0.01             | bnMapper      | Oligodendrocytes*        |
| 48 | 681          | 105              | 0.15             | bnMapper      | Excitatory Layer V       |
| 49 | 681          | 5                | 0.01             | bnMapper      | Rods                     |

Continued on next page

**Supplementary Table 13 – continued from previous page**

|    | <b># map</b> | <b># overlap</b> | <b>precision</b> | <b>method</b> | <b>sample</b>            |
|----|--------------|------------------|------------------|---------------|--------------------------|
| 50 | 681          | 94               | 0.14             | bnMapper      | Excitatory Layer IV      |
| 51 | 1209         | 9                | 0.01             | EpiAlignment  | Microglia                |
| 52 | 1209         | 12               | 0.01             | EpiAlignment  | Astrocytes*              |
| 53 | 1209         | 5                | 0.00             | EpiAlignment  | Cones (Blue)             |
| 54 | 1209         | 7                | 0.01             | EpiAlignment  | CD4 T-cells              |
| 55 | 1209         | 10               | 0.01             | EpiAlignment  | CD8 T-cells              |
| 56 | 1209         | 54               | 0.04             | EpiAlignment  | Excitatory Camk2a        |
| 57 | 1209         | 4                | 0.00             | EpiAlignment  | Inhibitory PV            |
| 58 | 1209         | 6                | 0.00             | EpiAlignment  | Inhibitory VIP           |
| 59 | 1209         | 100              | 0.08             | EpiAlignment  | Excitatory Layers II-III |
| 60 | 1209         | 58               | 0.05             | EpiAlignment  | Excitatory Layer VI*     |
| 61 | 1209         | 89               | 0.07             | EpiAlignment  | Excitatory DG*           |
| 62 | 1209         | 76               | 0.06             | EpiAlignment  | Excitatory Layers II-V*  |
| 63 | 1209         | 7                | 0.01             | EpiAlignment  | Embryonic DA forebrain   |
| 64 | 1209         | 92               | 0.08             | EpiAlignment  | Inhibitory Gad2          |
| 65 | 1209         | 5                | 0.00             | EpiAlignment  | Cones (Green)            |
| 66 | 1209         | 38               | 0.03             | EpiAlignment  | Inhibitory*              |
| 67 | 1209         | 42               | 0.03             | EpiAlignment  | Inhibitory MSN*          |
| 68 | 1209         | 11               | 0.01             | EpiAlignment  | Embryonic DA midbrain    |
| 69 | 1209         | 5                | 0.00             | EpiAlignment  | Microglia*               |
| 70 | 1209         | 9                | 0.01             | EpiAlignment  | Neun negative            |
| 71 | 1209         | 114              | 0.09             | EpiAlignment  | Excitatory Layer VI      |
| 72 | 1209         | 4                | 0.00             | EpiAlignment  | Oligodendrocytes*        |
| 73 | 1209         | 104              | 0.09             | EpiAlignment  | Excitatory Layer V       |
| 74 | 1209         | 3                | 0.00             | EpiAlignment  | Rods                     |
| 75 | 1209         | 100              | 0.08             | EpiAlignment  | Excitatory Layer IV      |
| 76 | 715          | 9                | 0.01             | UCSC liftOver | Microglia                |
| 77 | 715          | 10               | 0.01             | UCSC liftOver | Astrocytes*              |
| 78 | 715          | 9                | 0.01             | UCSC liftOver | Cones (Blue)             |
| 79 | 715          | 16               | 0.02             | UCSC liftOver | CD4 T-cells              |
| 80 | 715          | 16               | 0.02             | UCSC liftOver | CD8 T-cells              |
| 81 | 715          | 71               | 0.10             | UCSC liftOver | Excitatory Camk2a        |
| 82 | 715          | 12               | 0.02             | UCSC liftOver | Inhibitory PV            |
| 83 | 715          | 13               | 0.02             | UCSC liftOver | Inhibitory VIP           |
| 84 | 715          | 109              | 0.15             | UCSC liftOver | Excitatory Layers II-III |
| 85 | 715          | 78               | 0.11             | UCSC liftOver | Excitatory Layer VI*     |
| 86 | 715          | 114              | 0.16             | UCSC liftOver | Excitatory DG*           |
| 87 | 715          | 114              | 0.16             | UCSC liftOver | Excitatory Layers II-V*  |
| 88 | 715          | 17               | 0.02             | UCSC liftOver | Embryonic DA forebrain   |
| 89 | 715          | 102              | 0.14             | UCSC liftOver | Inhibitory Gad2          |
| 90 | 715          | 7                | 0.01             | UCSC liftOver | Cones (Green)            |
| 91 | 715          | 59               | 0.08             | UCSC liftOver | Inhibitory*              |
| 92 | 715          | 66               | 0.09             | UCSC liftOver | Inhibitory MSN*          |
| 93 | 715          | 15               | 0.02             | UCSC liftOver | Embryonic DA midbrain    |
| 94 | 715          | 6                | 0.01             | UCSC liftOver | Microglia*               |
| 95 | 715          | 12               | 0.02             | UCSC liftOver | Neun negative            |
| 96 | 715          | 112              | 0.16             | UCSC liftOver | Excitatory Layer VI      |
| 97 | 715          | 7                | 0.01             | UCSC liftOver | Oligodendrocytes*        |

Continued on next page

**Supplementary Table 13 – continued from previous page**

|     | <b># map</b> | <b># overlap</b> | <b>precision</b> | <b>method</b> | <b>sample</b>       |
|-----|--------------|------------------|------------------|---------------|---------------------|
| 98  | 715          | 109              | 0.15             | UCSC liftOver | Excitatory Layer V  |
| 99  | 715          | 5                | 0.01             | UCSC liftOver | Rods                |
| 100 | 715          | 99               | 0.14             | UCSC liftOver | Excitatory Layer IV |

Supplementary Table 13: Benchmarking AdaLiftOver on 1,648 SCZ GWAS SNPs.

|    | # mapped | # overlapped | precision | method        | cell type | trait |
|----|----------|--------------|-----------|---------------|-----------|-------|
| 1  | 226      | 14           | 0.06      | AdaLiftOver   | B         | MCV   |
| 2  | 226      | 12           | 0.05      | AdaLiftOver   | CD4       | MCV   |
| 3  | 226      | 10           | 0.04      | AdaLiftOver   | CD8       | MCV   |
| 4  | 226      | 39           | 0.17      | AdaLiftOver   | CMP       | MCV   |
| 5  | 226      | 36           | 0.16      | AdaLiftOver   | ERY       | MCV   |
| 6  | 226      | 33           | 0.15      | AdaLiftOver   | GMP       | MCV   |
| 7  | 226      | 16           | 0.07      | AdaLiftOver   | Mega      | MCV   |
| 8  | 226      | 35           | 0.15      | AdaLiftOver   | MEP       | MCV   |
| 9  | 226      | 11           | 0.05      | AdaLiftOver   | Mono      | MCV   |
| 10 | 226      | 14           | 0.06      | AdaLiftOver   | NK        | MCV   |
| 11 | 217      | 12           | 0.06      | bnMapper      | B         | MCV   |
| 12 | 217      | 9            | 0.04      | bnMapper      | CD4       | MCV   |
| 13 | 217      | 5            | 0.02      | bnMapper      | CD8       | MCV   |
| 14 | 217      | 36           | 0.17      | bnMapper      | CMP       | MCV   |
| 15 | 217      | 28           | 0.13      | bnMapper      | ERY       | MCV   |
| 16 | 217      | 27           | 0.12      | bnMapper      | GMP       | MCV   |
| 17 | 217      | 18           | 0.08      | bnMapper      | Mega      | MCV   |
| 18 | 217      | 36           | 0.17      | bnMapper      | MEP       | MCV   |
| 19 | 217      | 7            | 0.03      | bnMapper      | Mono      | MCV   |
| 20 | 217      | 11           | 0.05      | bnMapper      | NK        | MCV   |
| 21 | 527      | 18           | 0.03      | EpiAlignment  | B         | MCV   |
| 22 | 527      | 12           | 0.02      | EpiAlignment  | CD4       | MCV   |
| 23 | 527      | 10           | 0.02      | EpiAlignment  | CD8       | MCV   |
| 24 | 527      | 31           | 0.06      | EpiAlignment  | CMP       | MCV   |
| 25 | 527      | 31           | 0.06      | EpiAlignment  | ERY       | MCV   |
| 26 | 527      | 29           | 0.06      | EpiAlignment  | GMP       | MCV   |
| 27 | 527      | 15           | 0.03      | EpiAlignment  | Mega      | MCV   |
| 28 | 527      | 31           | 0.06      | EpiAlignment  | MEP       | MCV   |
| 29 | 527      | 12           | 0.02      | EpiAlignment  | Mono      | MCV   |
| 30 | 527      | 16           | 0.03      | EpiAlignment  | NK        | MCV   |
| 31 | 228      | 11           | 0.05      | UCSC liftOver | B         | MCV   |
| 32 | 228      | 10           | 0.04      | UCSC liftOver | CD4       | MCV   |
| 33 | 228      | 6            | 0.03      | UCSC liftOver | CD8       | MCV   |
| 34 | 228      | 39           | 0.17      | UCSC liftOver | CMP       | MCV   |
| 35 | 228      | 30           | 0.13      | UCSC liftOver | ERY       | MCV   |
| 36 | 228      | 29           | 0.13      | UCSC liftOver | GMP       | MCV   |
| 37 | 228      | 19           | 0.08      | UCSC liftOver | Mega      | MCV   |
| 38 | 228      | 38           | 0.17      | UCSC liftOver | MEP       | MCV   |
| 39 | 228      | 9            | 0.04      | UCSC liftOver | Mono      | MCV   |
| 40 | 228      | 11           | 0.05      | UCSC liftOver | NK        | MCV   |
| 41 | 271      | 19           | 0.07      | AdaLiftOver   | B         | MPV   |
| 42 | 271      | 21           | 0.08      | AdaLiftOver   | CD4       | MPV   |
| 43 | 271      | 22           | 0.08      | AdaLiftOver   | CD8       | MPV   |
| 44 | 271      | 53           | 0.20      | AdaLiftOver   | CMP       | MPV   |
| 45 | 271      | 29           | 0.11      | AdaLiftOver   | ERY       | MPV   |
| 46 | 271      | 52           | 0.19      | AdaLiftOver   | GMP       | MPV   |
| 47 | 271      | 46           | 0.17      | AdaLiftOver   | Mega      | MPV   |
| 48 | 271      | 39           | 0.14      | AdaLiftOver   | MEP       | MPV   |
| 49 | 271      | 16           | 0.06      | AdaLiftOver   | Mono      | MPV   |

Continued on next page

**Supplementary Table 14 – continued from previous page**

|    | <b># mapped</b> | <b># overlapped</b> | <b>precision</b> | <b>method</b> | <b>cell type</b> | <b>trait</b> |
|----|-----------------|---------------------|------------------|---------------|------------------|--------------|
| 50 | 271             | 25                  | 0.09             | AdaLiftOver   | NK               | MPV          |
| 51 | 277             | 15                  | 0.05             | bnMapper      | B                | MPV          |
| 52 | 277             | 16                  | 0.06             | bnMapper      | CD4              | MPV          |
| 53 | 277             | 19                  | 0.07             | bnMapper      | CD8              | MPV          |
| 54 | 277             | 46                  | 0.17             | bnMapper      | CMP              | MPV          |
| 55 | 277             | 20                  | 0.07             | bnMapper      | ERY              | MPV          |
| 56 | 277             | 41                  | 0.15             | bnMapper      | GMP              | MPV          |
| 57 | 277             | 36                  | 0.13             | bnMapper      | Mega             | MPV          |
| 58 | 277             | 34                  | 0.12             | bnMapper      | MEP              | MPV          |
| 59 | 277             | 15                  | 0.05             | bnMapper      | Mono             | MPV          |
| 60 | 277             | 20                  | 0.07             | bnMapper      | NK               | MPV          |
| 61 | 590             | 12                  | 0.02             | EpiAlignment  | B                | MPV          |
| 62 | 590             | 8                   | 0.01             | EpiAlignment  | CD4              | MPV          |
| 63 | 590             | 9                   | 0.02             | EpiAlignment  | CD8              | MPV          |
| 64 | 590             | 41                  | 0.07             | EpiAlignment  | CMP              | MPV          |
| 65 | 590             | 26                  | 0.04             | EpiAlignment  | ERY              | MPV          |
| 66 | 590             | 47                  | 0.08             | EpiAlignment  | GMP              | MPV          |
| 67 | 590             | 38                  | 0.06             | EpiAlignment  | Mega             | MPV          |
| 68 | 590             | 29                  | 0.05             | EpiAlignment  | MEP              | MPV          |
| 69 | 590             | 20                  | 0.03             | EpiAlignment  | Mono             | MPV          |
| 70 | 590             | 15                  | 0.03             | EpiAlignment  | NK               | MPV          |
| 71 | 287             | 16                  | 0.06             | UCSC liftOver | B                | MPV          |
| 72 | 287             | 16                  | 0.06             | UCSC liftOver | CD4              | MPV          |
| 73 | 287             | 19                  | 0.07             | UCSC liftOver | CD8              | MPV          |
| 74 | 287             | 48                  | 0.17             | UCSC liftOver | CMP              | MPV          |
| 75 | 287             | 22                  | 0.08             | UCSC liftOver | ERY              | MPV          |
| 76 | 287             | 42                  | 0.15             | UCSC liftOver | GMP              | MPV          |
| 77 | 287             | 38                  | 0.13             | UCSC liftOver | Mega             | MPV          |
| 78 | 287             | 36                  | 0.13             | UCSC liftOver | MEP              | MPV          |
| 79 | 287             | 16                  | 0.06             | UCSC liftOver | Mono             | MPV          |
| 80 | 287             | 21                  | 0.07             | UCSC liftOver | NK               | MPV          |
| 81 | 161             | 14                  | 0.09             | AdaLiftOver   | B                | Mono         |
| 82 | 161             | 17                  | 0.11             | AdaLiftOver   | CD4              | Mono         |
| 83 | 161             | 15                  | 0.09             | AdaLiftOver   | CD8              | Mono         |
| 84 | 161             | 24                  | 0.15             | AdaLiftOver   | CMP              | Mono         |
| 85 | 161             | 8                   | 0.05             | AdaLiftOver   | ERY              | Mono         |
| 86 | 161             | 39                  | 0.24             | AdaLiftOver   | GMP              | Mono         |
| 87 | 161             | 23                  | 0.14             | AdaLiftOver   | Mega             | Mono         |
| 88 | 161             | 10                  | 0.06             | AdaLiftOver   | MEP              | Mono         |
| 89 | 161             | 29                  | 0.18             | AdaLiftOver   | Mono             | Mono         |
| 90 | 161             | 20                  | 0.12             | AdaLiftOver   | NK               | Mono         |
| 91 | 186             | 14                  | 0.08             | bnMapper      | B                | Mono         |
| 92 | 186             | 10                  | 0.05             | bnMapper      | CD4              | Mono         |
| 93 | 186             | 9                   | 0.05             | bnMapper      | CD8              | Mono         |
| 94 | 186             | 22                  | 0.12             | bnMapper      | CMP              | Mono         |
| 95 | 186             | 7                   | 0.04             | bnMapper      | ERY              | Mono         |
| 96 | 186             | 41                  | 0.22             | bnMapper      | GMP              | Mono         |
| 97 | 186             | 29                  | 0.16             | bnMapper      | Mega             | Mono         |

Continued on next page



**Supplementary Table 14 – continued from previous page**

|     | # mapped | # overlapped | precision | method        | cell type | trait |
|-----|----------|--------------|-----------|---------------|-----------|-------|
| 98  | 186      | 11           | 0.06      | bnMapper      | MEP       | Mono  |
| 99  | 186      | 24           | 0.13      | bnMapper      | Mono      | Mono  |
| 100 | 186      | 16           | 0.09      | bnMapper      | NK        | Mono  |
| 101 | 383      | 14           | 0.04      | EpiAlignment  | B         | Mono  |
| 102 | 383      | 9            | 0.02      | EpiAlignment  | CD4       | Mono  |
| 103 | 383      | 15           | 0.04      | EpiAlignment  | CD8       | Mono  |
| 104 | 383      | 12           | 0.03      | EpiAlignment  | CMP       | Mono  |
| 105 | 383      | 3            | 0.01      | EpiAlignment  | ERY       | Mono  |
| 106 | 383      | 26           | 0.07      | EpiAlignment  | GMP       | Mono  |
| 107 | 383      | 10           | 0.03      | EpiAlignment  | Mega      | Mono  |
| 108 | 383      | 9            | 0.02      | EpiAlignment  | MEP       | Mono  |
| 109 | 383      | 20           | 0.05      | EpiAlignment  | Mono      | Mono  |
| 110 | 383      | 10           | 0.03      | EpiAlignment  | NK        | Mono  |
| 111 | 202      | 16           | 0.08      | UCSC liftOver | B         | Mono  |
| 112 | 202      | 11           | 0.05      | UCSC liftOver | CD4       | Mono  |
| 113 | 202      | 9            | 0.04      | UCSC liftOver | CD8       | Mono  |
| 114 | 202      | 24           | 0.12      | UCSC liftOver | CMP       | Mono  |
| 115 | 202      | 7            | 0.03      | UCSC liftOver | ERY       | Mono  |
| 116 | 202      | 44           | 0.22      | UCSC liftOver | GMP       | Mono  |
| 117 | 202      | 31           | 0.15      | UCSC liftOver | Mega      | Mono  |
| 118 | 202      | 11           | 0.05      | UCSC liftOver | MEP       | Mono  |
| 119 | 202      | 25           | 0.12      | UCSC liftOver | Mono      | Mono  |
| 120 | 202      | 17           | 0.08      | UCSC liftOver | NK        | Mono  |
| 121 | 148      | 31           | 0.21      | AdaLiftOver   | B         | Lymph |
| 122 | 148      | 31           | 0.21      | AdaLiftOver   | CD4       | Lymph |
| 123 | 148      | 33           | 0.22      | AdaLiftOver   | CD8       | Lymph |
| 124 | 148      | 16           | 0.11      | AdaLiftOver   | CMP       | Lymph |
| 125 | 148      | 12           | 0.08      | AdaLiftOver   | ERY       | Lymph |
| 126 | 148      | 16           | 0.11      | AdaLiftOver   | GMP       | Lymph |
| 127 | 148      | 18           | 0.12      | AdaLiftOver   | Mega      | Lymph |
| 128 | 148      | 15           | 0.10      | AdaLiftOver   | MEP       | Lymph |
| 129 | 148      | 13           | 0.09      | AdaLiftOver   | Mono      | Lymph |
| 130 | 148      | 27           | 0.18      | AdaLiftOver   | NK        | Lymph |
| 131 | 194      | 20           | 0.10      | bnMapper      | B         | Lymph |
| 132 | 194      | 23           | 0.12      | bnMapper      | CD4       | Lymph |
| 133 | 194      | 24           | 0.12      | bnMapper      | CD8       | Lymph |
| 134 | 194      | 9            | 0.05      | bnMapper      | CMP       | Lymph |
| 135 | 194      | 7            | 0.04      | bnMapper      | ERY       | Lymph |
| 136 | 194      | 8            | 0.04      | bnMapper      | GMP       | Lymph |
| 137 | 194      | 10           | 0.05      | bnMapper      | Mega      | Lymph |
| 138 | 194      | 11           | 0.06      | bnMapper      | MEP       | Lymph |
| 139 | 194      | 8            | 0.04      | bnMapper      | Mono      | Lymph |
| 140 | 194      | 18           | 0.09      | bnMapper      | NK        | Lymph |
| 141 | 412      | 19           | 0.05      | EpiAlignment  | B         | Lymph |
| 142 | 412      | 20           | 0.05      | EpiAlignment  | CD4       | Lymph |
| 143 | 412      | 19           | 0.05      | EpiAlignment  | CD8       | Lymph |
| 144 | 412      | 13           | 0.03      | EpiAlignment  | CMP       | Lymph |
| 145 | 412      | 5            | 0.01      | EpiAlignment  | ERY       | Lymph |

Continued on next page

**Supplementary Table 14 – continued from previous page**

|     | # mapped | # overlapped | precision | method        | cell type | trait     |
|-----|----------|--------------|-----------|---------------|-----------|-----------|
| 146 | 412      | 12           | 0.03      | EpiAlignment  | GMP       | Lymph     |
| 147 | 412      | 11           | 0.03      | EpiAlignment  | Mega      | Lymph     |
| 148 | 412      | 4            | 0.01      | EpiAlignment  | MEP       | Lymph     |
| 149 | 412      | 8            | 0.02      | EpiAlignment  | Mono      | Lymph     |
| 150 | 412      | 20           | 0.05      | EpiAlignment  | NK        | Lymph     |
| 151 | 209      | 22           | 0.11      | UCSC liftOver | B         | Lymph     |
| 152 | 209      | 25           | 0.12      | UCSC liftOver | CD4       | Lymph     |
| 153 | 209      | 26           | 0.12      | UCSC liftOver | CD8       | Lymph     |
| 154 | 209      | 11           | 0.05      | UCSC liftOver | CMP       | Lymph     |
| 155 | 209      | 7            | 0.03      | UCSC liftOver | ERY       | Lymph     |
| 156 | 209      | 9            | 0.04      | UCSC liftOver | GMP       | Lymph     |
| 157 | 209      | 11           | 0.05      | UCSC liftOver | Mega      | Lymph     |
| 158 | 209      | 11           | 0.05      | UCSC liftOver | MEP       | Lymph     |
| 159 | 209      | 10           | 0.05      | UCSC liftOver | Mono      | Lymph     |
| 160 | 209      | 20           | 0.10      | UCSC liftOver | NK        | Lymph     |
| 161 | 47       | 1            | 0.02      | AdaLiftOver   | B         | Alzheimer |
| 162 | 47       | 0            | 0.00      | AdaLiftOver   | CD4       | Alzheimer |
| 163 | 47       | 3            | 0.06      | AdaLiftOver   | CD8       | Alzheimer |
| 164 | 47       | 3            | 0.06      | AdaLiftOver   | CMP       | Alzheimer |
| 165 | 47       | 1            | 0.02      | AdaLiftOver   | ERY       | Alzheimer |
| 166 | 47       | 3            | 0.06      | AdaLiftOver   | GMP       | Alzheimer |
| 167 | 47       | 3            | 0.06      | AdaLiftOver   | Mega      | Alzheimer |
| 168 | 47       | 1            | 0.02      | AdaLiftOver   | MEP       | Alzheimer |
| 169 | 47       | 0            | 0.00      | AdaLiftOver   | Mono      | Alzheimer |
| 170 | 47       | 1            | 0.02      | AdaLiftOver   | NK        | Alzheimer |
| 171 | 91       | 0            | 0.00      | bnMapper      | B         | Alzheimer |
| 172 | 91       | 0            | 0.00      | bnMapper      | CD4       | Alzheimer |
| 173 | 91       | 2            | 0.02      | bnMapper      | CD8       | Alzheimer |
| 174 | 91       | 2            | 0.02      | bnMapper      | CMP       | Alzheimer |
| 175 | 91       | 0            | 0.00      | bnMapper      | ERY       | Alzheimer |
| 176 | 91       | 3            | 0.03      | bnMapper      | GMP       | Alzheimer |
| 177 | 91       | 4            | 0.04      | bnMapper      | Mega      | Alzheimer |
| 178 | 91       | 0            | 0.00      | bnMapper      | MEP       | Alzheimer |
| 179 | 91       | 0            | 0.00      | bnMapper      | Mono      | Alzheimer |
| 180 | 91       | 0            | 0.00      | bnMapper      | NK        | Alzheimer |
| 181 | 204      | 6            | 0.03      | EpiAlignment  | B         | Alzheimer |
| 182 | 204      | 3            | 0.01      | EpiAlignment  | CD4       | Alzheimer |
| 183 | 204      | 0            | 0.00      | EpiAlignment  | CD8       | Alzheimer |
| 184 | 204      | 5            | 0.02      | EpiAlignment  | CMP       | Alzheimer |
| 185 | 204      | 2            | 0.01      | EpiAlignment  | ERY       | Alzheimer |
| 186 | 204      | 6            | 0.03      | EpiAlignment  | GMP       | Alzheimer |
| 187 | 204      | 2            | 0.01      | EpiAlignment  | Mega      | Alzheimer |
| 188 | 204      | 2            | 0.01      | EpiAlignment  | MEP       | Alzheimer |
| 189 | 204      | 1            | 0.00      | EpiAlignment  | Mono      | Alzheimer |
| 190 | 204      | 3            | 0.01      | EpiAlignment  | NK        | Alzheimer |
| 191 | 94       | 0            | 0.00      | UCSC liftOver | B         | Alzheimer |
| 192 | 94       | 0            | 0.00      | UCSC liftOver | CD4       | Alzheimer |
| 193 | 94       | 2            | 0.02      | UCSC liftOver | CD8       | Alzheimer |

Continued on next page

**Supplementary Table 14 – continued from previous page**

|     | <b># mapped</b> | <b># overlapped</b> | <b>precision</b> | <b>method</b> | <b>cell type</b> | <b>trait</b> |
|-----|-----------------|---------------------|------------------|---------------|------------------|--------------|
| 194 | 94              | 2                   | 0.02             | UCSC liftOver | CMP              | Alzheimer    |
| 195 | 94              | 0                   | 0.00             | UCSC liftOver | ERY              | Alzheimer    |
| 196 | 94              | 3                   | 0.03             | UCSC liftOver | GMP              | Alzheimer    |
| 197 | 94              | 4                   | 0.04             | UCSC liftOver | Mega             | Alzheimer    |
| 198 | 94              | 0                   | 0.00             | UCSC liftOver | MEP              | Alzheimer    |
| 199 | 94              | 0                   | 0.00             | UCSC liftOver | Mono             | Alzheimer    |
| 200 | 94              | 0                   | 0.00             | UCSC liftOver | NK               | Alzheimer    |

Supplementary Table 14: Benchmarking AdaLiftOver on hematopoietic GWAS SNPs for 4 traits: MCV (570), MPV (646), Mono (441), Lymph (466). The Alzheimer (218) GWAS SNPs are treated as negative controls.

|   | # mapped GWAS | # overlapped GWAS | # genes | precision | method        |
|---|---------------|-------------------|---------|-----------|---------------|
| 1 | 1060          | 86                | 30      | 0.08      | AdaLiftOver   |
| 2 | 1502          | 62                | 28      | 0.04      | bnMapper      |
| 3 | 1586          | 65                | 29      | 0.04      | UCSC liftOver |
| 4 | 2526          | 62                | 23      | 0.02      | EpiAlignment  |

Supplementary Table 15: Benchmarking AdaLiftOver on BMD GWAS SNPs. Mapping of the 3,125 BMD fine-mapped GWAS SNPs to 52 BMD genes in mouse. Distance = 250 kb.

|   | # mapped GWAS | # overlapped GWAS | # genes | precision | distance | method        |
|---|---------------|-------------------|---------|-----------|----------|---------------|
| 1 | 29486         | 14                | 11      | 0.00      | 0        | AdaLiftOver   |
| 2 | 38797         | 5                 | 3       | 0.00      | 0        | bnMapper      |
| 3 | 41278         | 6                 | 4       | 0.00      | 0        | UCSC liftOver |
| 4 | 29486         | 1096              | 71      | 0.04      | 100kb    | AdaLiftOver   |
| 5 | 38797         | 791               | 67      | 0.02      | 100kb    | bnMapper      |
| 6 | 41278         | 878               | 74      | 0.02      | 100kb    | UCSC liftOver |
| 7 | 29486         | 2140              | 90      | 0.07      | 250kb    | AdaLiftOver   |
| 8 | 38797         | 1661              | 89      | 0.04      | 250kb    | bnMapper      |
| 9 | 41278         | 1813              | 102     | 0.04      | 250kb    | UCSC liftOver |

Supplementary Table 16: Benchmarking AdaLiftOver on BMD GWAS SNPs. Mapping of the 116,402 BMD fine-mapped GWAS SNPs to 200 BMD genes in mouse.

### 3 Supplementary Figures

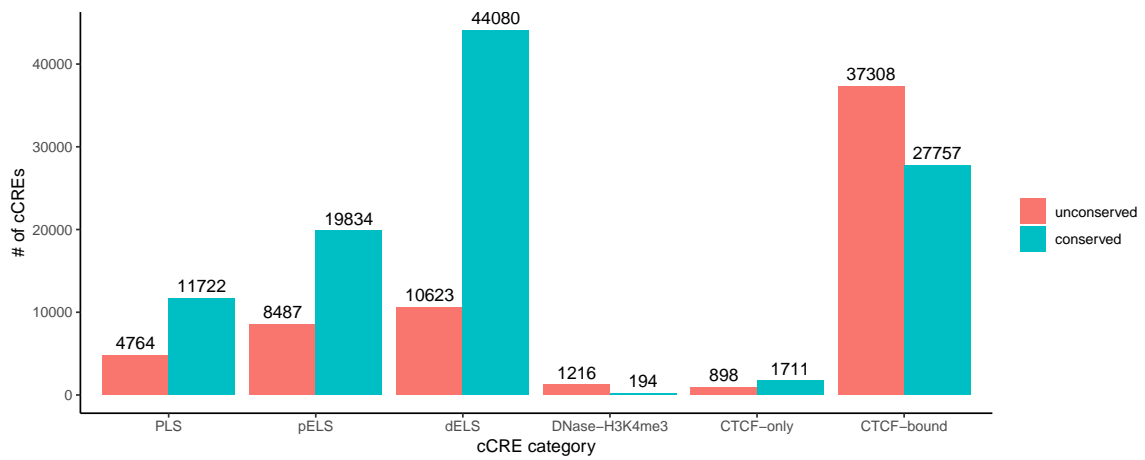

Supplementary Figure 1: The summary of categories between orthologous cCREs. X-axis: the human cCRE category. Y-axis: the number of orthologous mouse cCREs that fall into the same category (conserved) or a different category (unconserved).

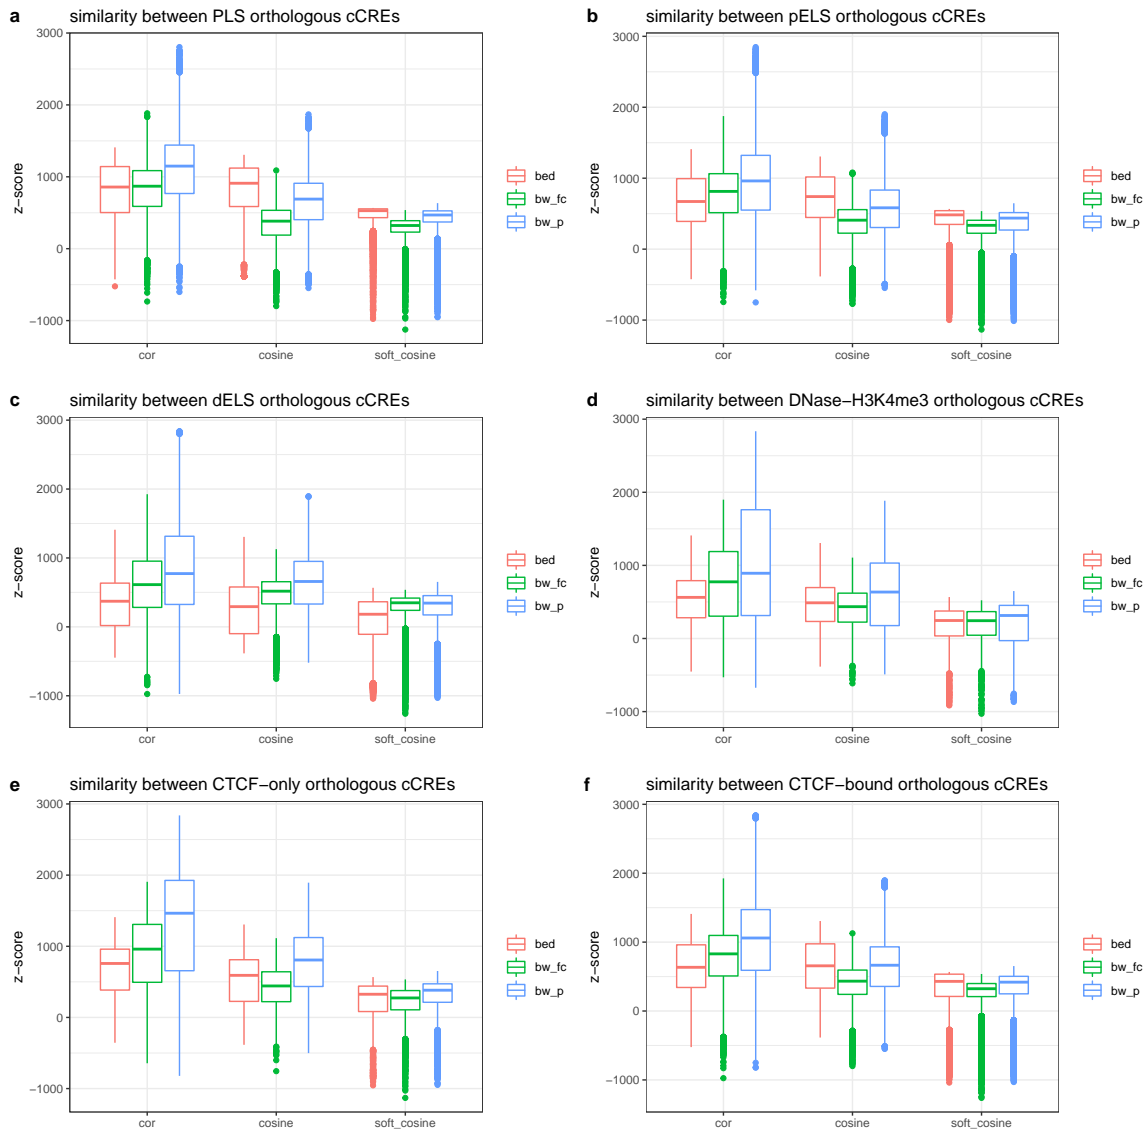

Supplementary Figure 2: Comparison of epigenome similarities for different classes of orthologous cCREs with three different metrics (*cor*: Pearson's correlation; *cosine*: cosine similarity; *soft\_cosine*: soft cosine similarity) and three different data formats (*bed*: BED format; *bw\_fc*: fold change BigWig format; *bw\_p*: p-value BigWig format) for constructing the epigenomic features. A null distribution for each of the similarity scores is estimated by randomly permuting cCREs 10,000 times. Observed similarity scores were transformed into z-scores using the mean and variance estimates of these null distributions.

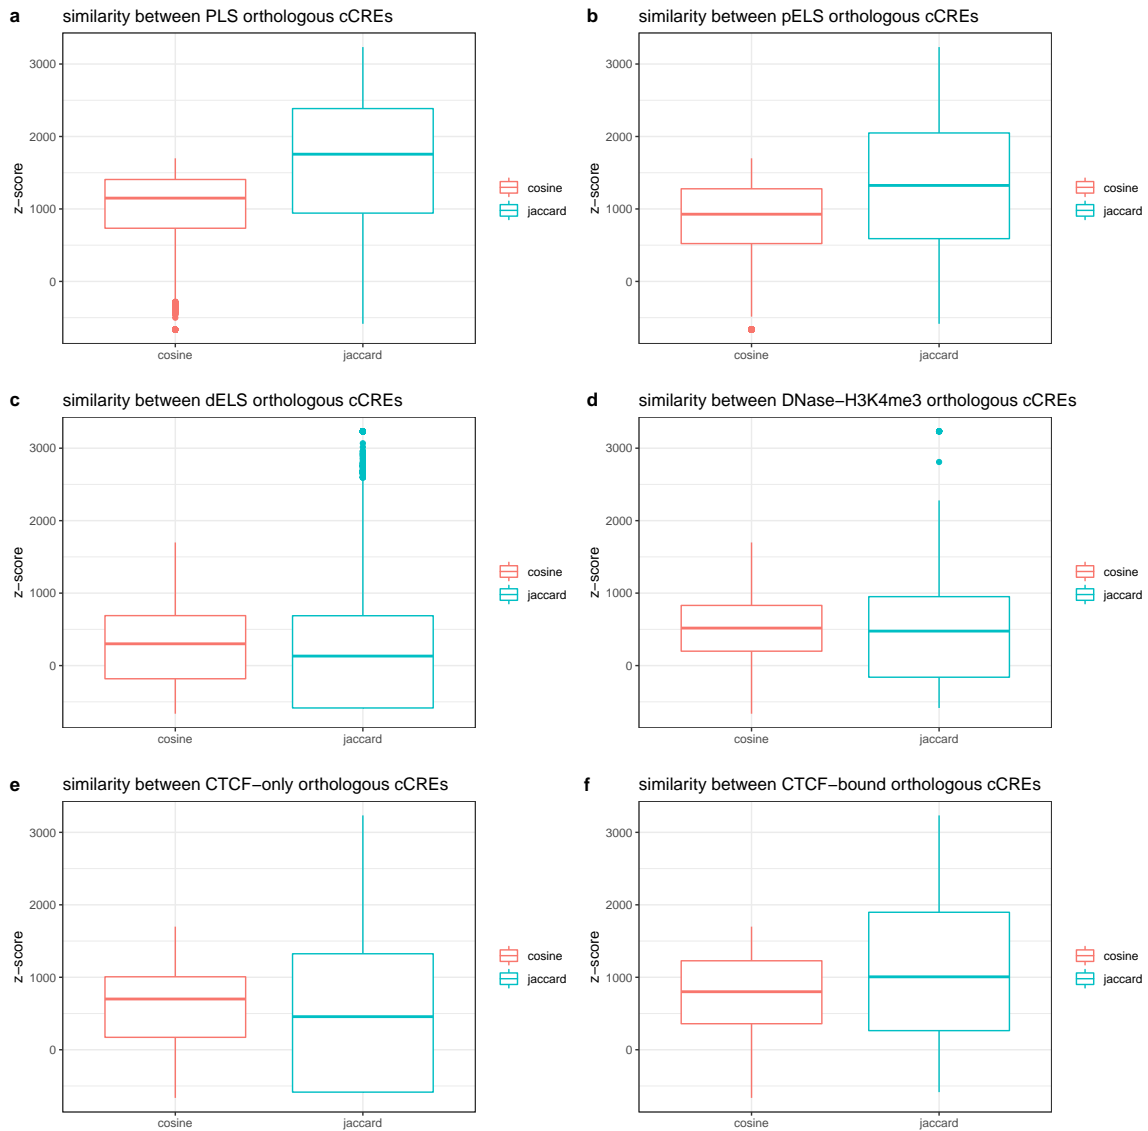

Supplementary Figure 3: Comparison of similarity metrics (cosine: cosine similarity; jaccard: Jaccard similarity) for binary epigenomic features (BED format). A null distribution for each of the similarity scores is estimated by randomly permuting cCREs. Observed similarity scores were transformed into z-scores using the mean and variance estimates of these null distributions.

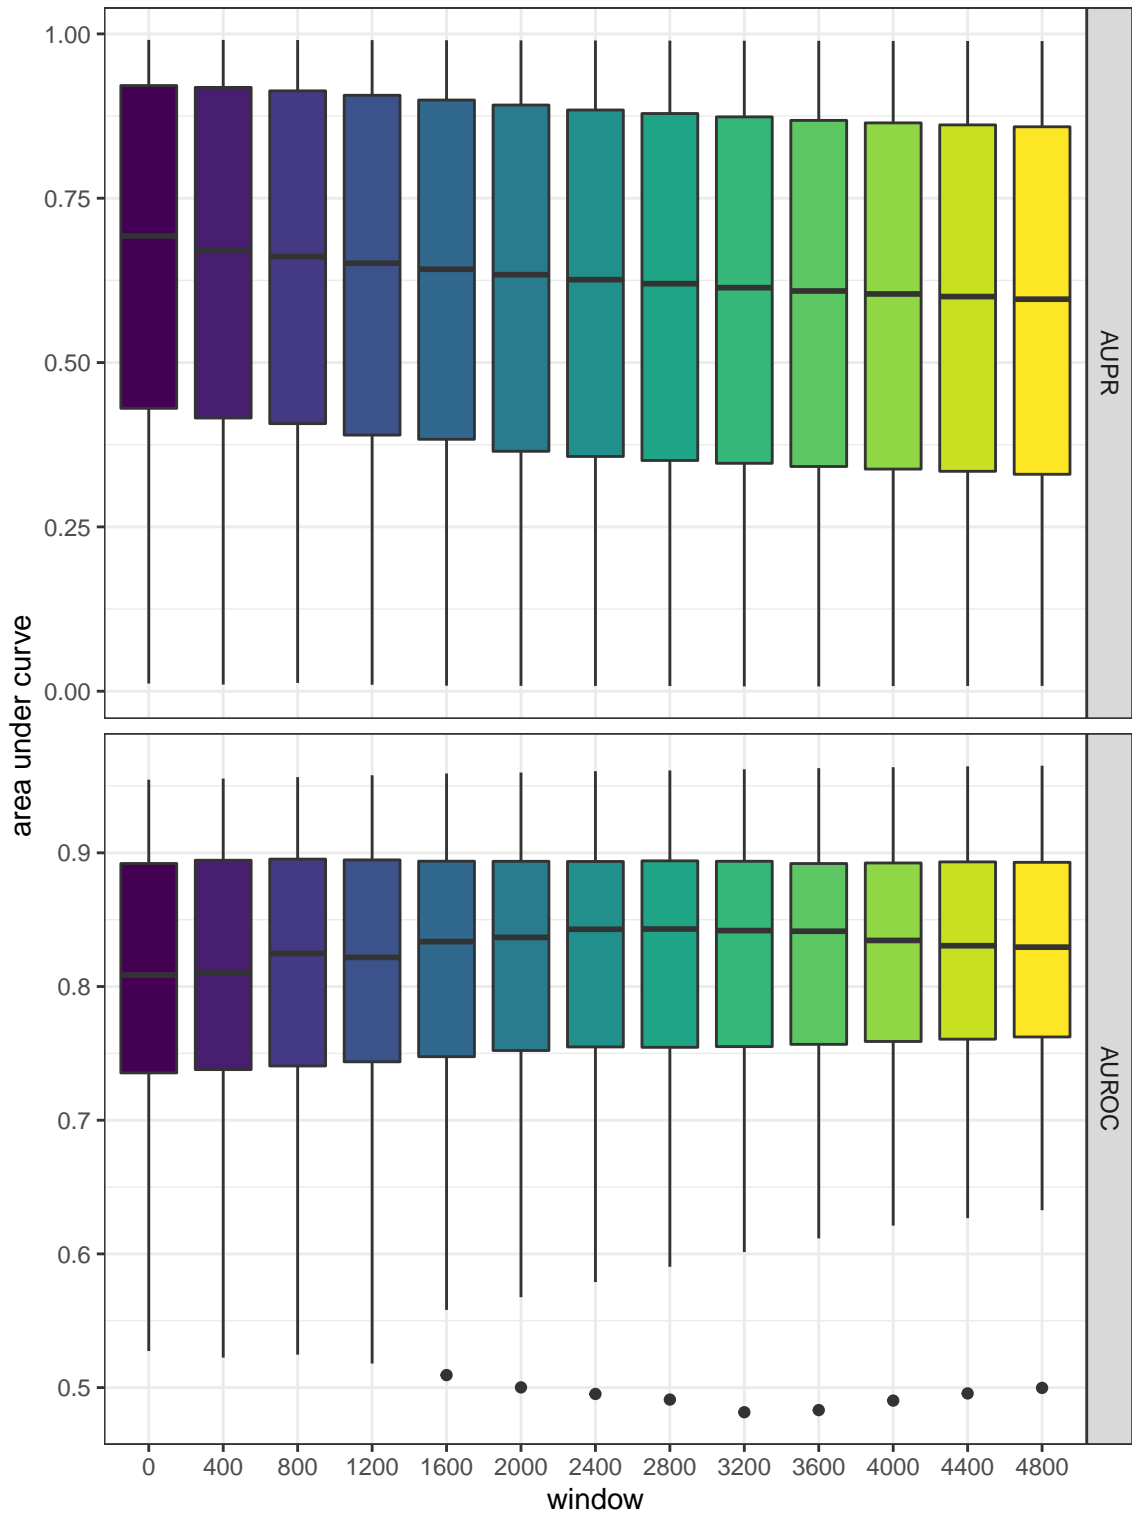

Supplementary Figure 4: Summary of the leave-one-out cross-validation experiments with 67 epigenome datasets over a grid of windows.



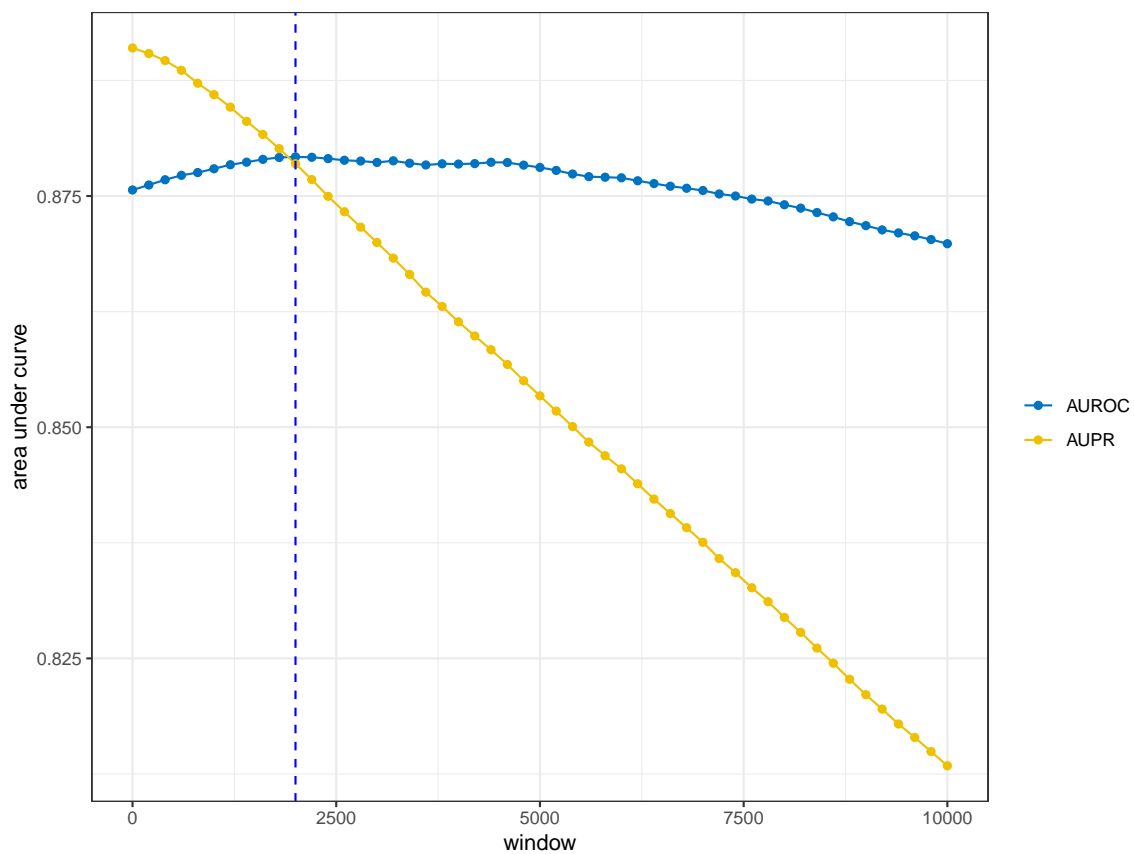

Supplementary Figure 5: The area under ROC/PR curve over a grid of windows from the mouse islet ATAC-seq peak analysis. AUROC and AUPR values are obtained for the set of candidate target regions generated at different local window sizes by fitting a logistic regression on the data labelled using the human islet ATAC-seq peaks as the gold standard. The vertical blue dashed line depicts window size of 2 kb.

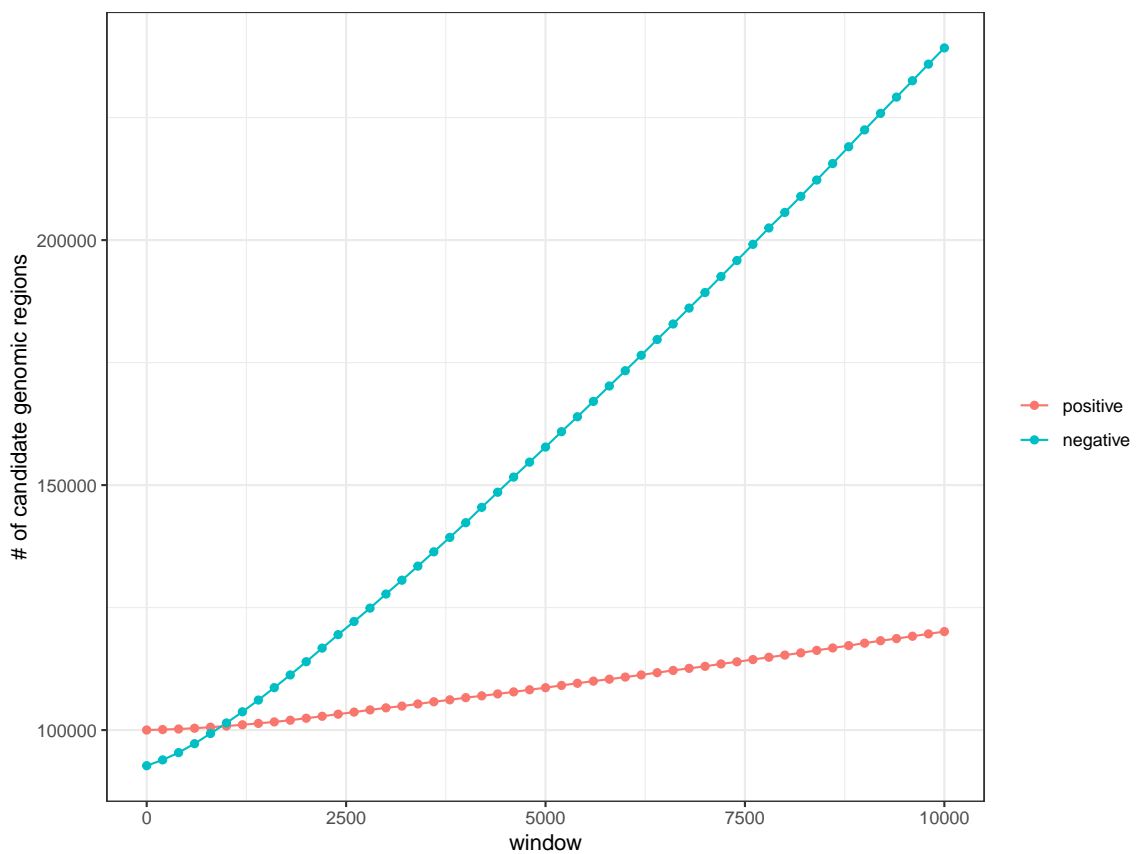

Supplementary Figure 6: As the local window size increases, it generates more candidate target regions, which results in an imbalance between the numbers of positive and negative cases, and hence the decreasing pattern in AUPR (Supplementary Figure 5).

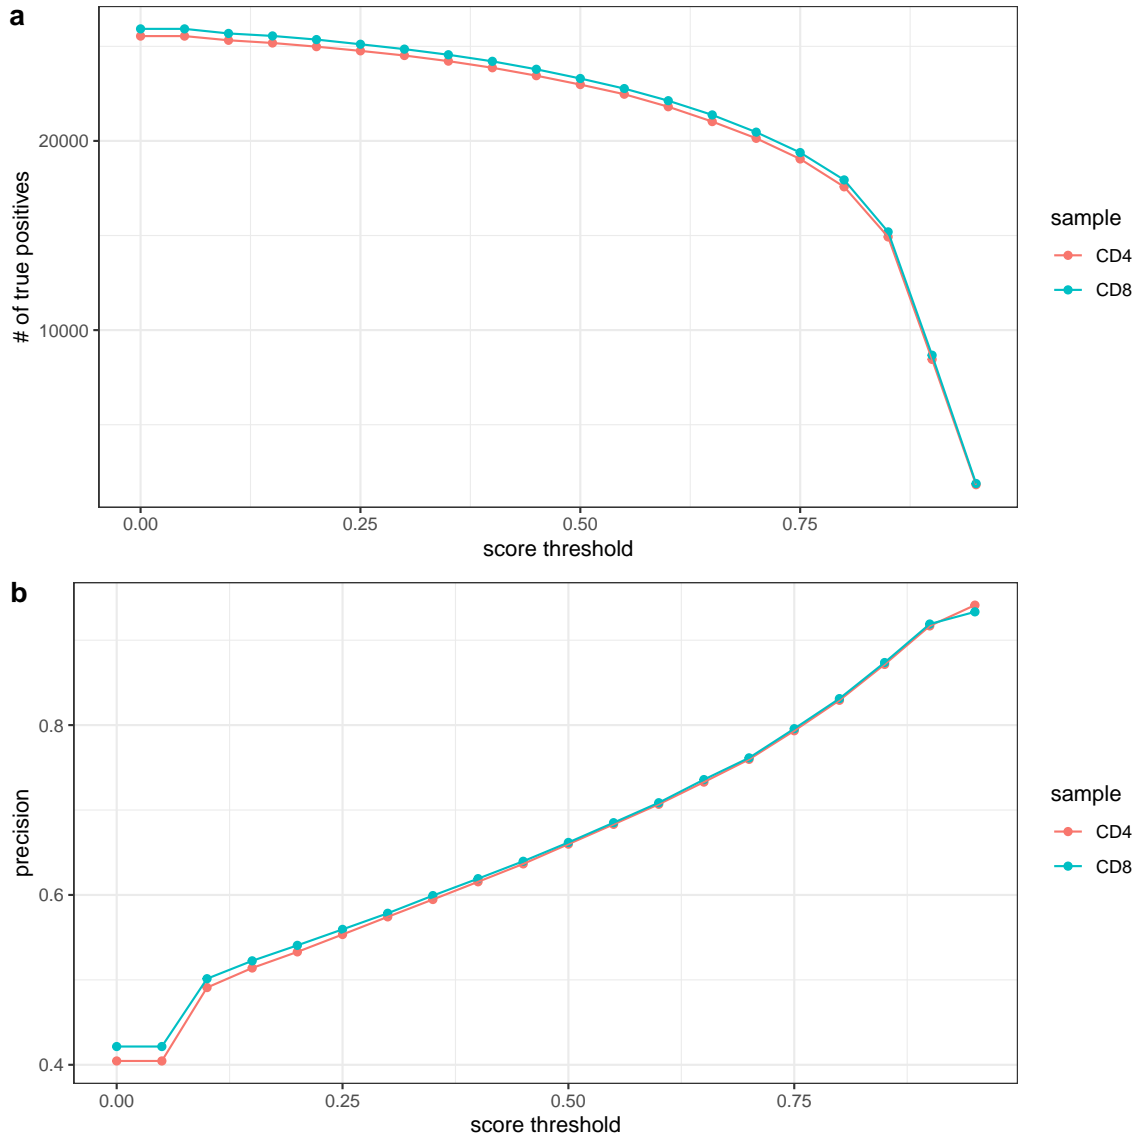

Supplementary Figure 7: The effects of logistic probability score threshold over # of true positives (a) and precision (b) for the orthologous CD4 and CD8 ATAC-seq data. # of true positives: the number of mouse-derived peaks that overlaps human peaks; precision: # of true positives / # of mouse-derived peaks.

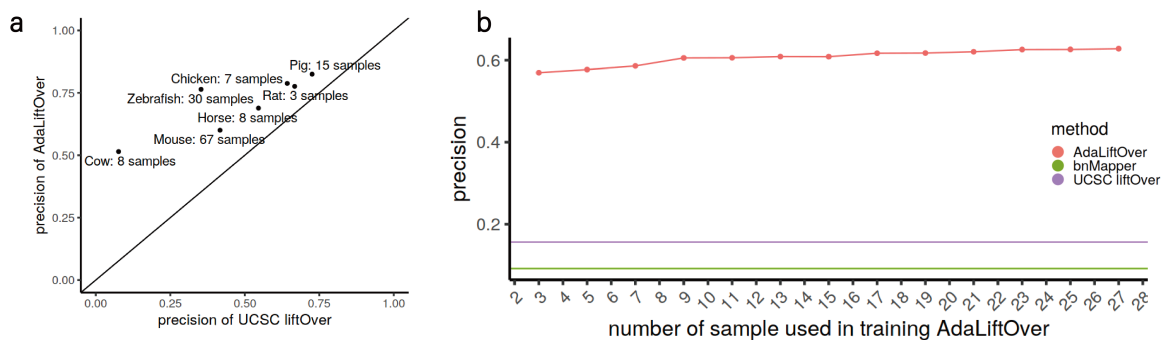

Supplementary Figure 8: **a.** Average precision of AdaLiftOver versus UCSC liftOver across 7 species. **b.** Precision of AdaLiftOver as a function of the number of epigenome datasets used in the training in zebrafish.

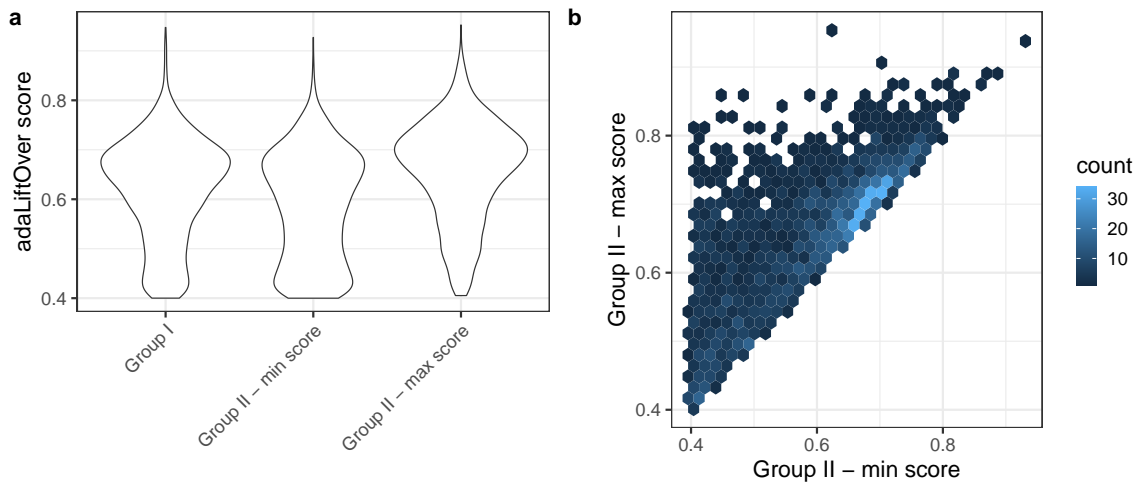

Supplementary Figure 9: **a.** adaLift scores of regions in groups I (unique regions) and II (multi-mapper regions with min and max scores) after filtering regions with scores less than 0.4. **b.** Maximum and minimum adaLiftOver scores for regions in Group II (multi-region mappings) after filtering regions with scores less than 0.4.

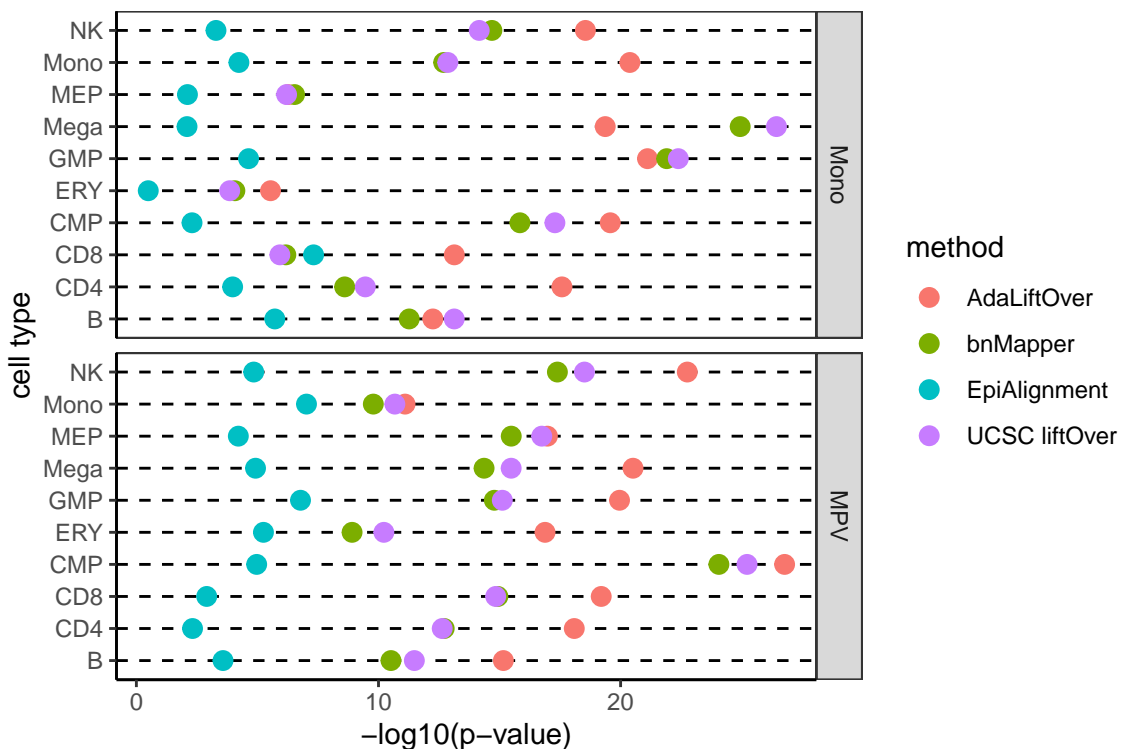

Supplementary Figure 10: Enrichment analysis for fine-mapped GWAS SNPs from two other hematopoietic traits with respect to 10 hematopoietic ATAC-seq peaks. Mono: monocyte count, MPV: mean platelet volume.

## References

- Cheng, Y., Ma, Z., Kim, B.-H., Wu, W., Cayting, P., Boyle, A. P., Sundaram, V., Xing, X., Dogan, N., Li, J., *et al.* (2014). Principles of regulatory information conservation between mouse and human. *Nature*, **515**(7527), 371–375.
- Denas, O., Sandstrom, R., Cheng, Y., Beal, K., Herrero, J., Hardison, R. C., and Taylor, J. (2015). Genome-wide comparative analysis reveals human-mouse regulatory landscape and evolution. *BMC genomics*, **16**(1), 1–9.
- Hinrichs, A. S., Karolchik, D., Baertsch, R., Barber, G. P., Bejerano, G., Clawson, H., Diekhans, M., Furey, T. S., Harte, R. A., Hsu, F., *et al.* (2006). The ucsc genome browser database: update 2006. *Nucleic acids research*, **34**(suppl\_1), D590–D598.
- Hook, P. W. and McCallion, A. S. (2020). Leveraging mouse chromatin data for heritability enrichment informs common disease architecture and reveals cortical layer contributions to schizophrenia. *Genome research*, **30**(4), 528–539.
- Kern, C., Wang, Y., Xu, X., Pan, Z., Halstead, M., Chanthavixay, G., Saelao, P., Waters, S., Xiang, R., Chamberlain, A., *et al.* (2021). Functional annotations of three domestic animal genomes provide vital resources for comparative and agricultural research. *Nature communications*, **12**(1), 1821.
- Kingsley, N., Kern, C., Creppe, C., Hales, E. N., Zhou, H., Kalbfleisch, T., MacLeod, J. N., Petersen, J. L., Finno, C. J., and Bellone, R. R. (2019). Functionally annotating regulatory elements in the equine genome using histone mark chip-seq. *Genes*, **11**(1), 3.
- Lien, Y.-C., Wang, P. Z., Lu, X. M., and Simmons, R. A. (2020). Altered transcription factor binding and gene bivalency in islets of intrauterine growth retarded rats. *Cells*, **9**(6), 1435.
- Lu, J., Cao, X., and Zhong, S. (2019). Epialignment: alignment with both dna sequence and epigenomic data. *Nucleic acids research*, **47**(W1), W11–W19.
- Morris, J. A., Kemp, J. P., Youlten, S. E., Laurent, L., Logan, J. G., Chai, R. C., Vulpescu, N. A., Forgetta, V., Kleinman, A., Mohanty, S. T., *et al.* (2019). An atlas of genetic influences on osteoporosis in humans and mice. *Nature genetics*, **51**(2), 258–266.
- Rintisch, C., Heinig, M., Bauerfeind, A., Schafer, S., Mieth, C., Patone, G., Hummel, O., Chen, W., Cook, S., Cuppen, E., *et al.* (2014). Natural variation of histone modification and its impact on gene expression in the rat genome. *Genome research*, **24**(6), 942–953.
- Treviño, L. S., Dong, J., Kaushal, A., Katz, T. A., Jangid, R. K., Robertson, M. J., Grimm, S. L., Ambati, C. S. R., Putluri, V., Cox, A. R., *et al.* (2020). Epigenome environment interactions accelerate epigenomic aging and unlock metabolically restricted epigenetic reprogramming in adulthood. *Nature communications*, **11**(1), 2316.
- Ulirsch, J. C., Lareau, C. A., Bao, E. L., Ludwig, L. S., Guo, M. H., Benner, C., Satpathy, A. T., Kartha, V. K., Salem, R. M., Hirschhorn, J. N., *et al.* (2019). Interrogation of human hematopoiesis at single-cell and single-variant resolution. *Nature genetics*, **51**(4), 683–693.
- Xiang, G., Keller, C. A., Heuston, E., Giardine, B. M., An, L., Wixom, A. Q., Miller, A., Cockburn, A., Sauria, M. E., Weaver, K., *et al.* (2020). An integrative view of the regulatory and transcriptional landscapes in mouse hematopoiesis. *Genome research*, **30**(3), 472–484.
- Yang, H., Luan, Y., Liu, T., Lee, H. J., Fang, L., Wang, Y., Wang, X., Zhang, B., Jin, Q., Ang, K. C., *et al.* (2020). A map of cis-regulatory elements and 3d genome structures in zebrafish. *Nature*, **588**(7837), 337–343.

Zhao, Y., Hou, Y., Xu, Y., Luan, Y., Zhou, H., Qi, X., Hu, M., Wang, D., Wang, Z., Fu, Y., *et al.* (2021). A compendium and comparative epigenomics analysis of cis-regulatory elements in the pig genome. *Nature communications*, **12**(1), 2217.
